1 **Title:** Enhanced skeletal muscle ribosome biogenesis, yet attenuated mTORC1 and ribosome  
2 biogenesis-related signalling, with concurrent versus single-mode resistance training.

3

4 **Authors:** Jackson J. Fyfe<sup>1,2,3\*</sup>, David J. Bishop<sup>1,4</sup>, Jonathan D. Bartlett<sup>1</sup>, Erik D. Hanson<sup>1,5</sup>, Mitchell J.  
5 Anderson<sup>1</sup>, Andrew P. Garnham<sup>1,2</sup> & Nigel K. Stepto<sup>1,6,7</sup>.

6

7 **Affiliations:**

8 1) Institute of Sport, Exercise and Active Living (ISEAL), Victoria University, Melbourne, Australia;  
9 2) School of Exercise and Nutrition Sciences, Deakin University, Melbourne, Australia; 3) Centre for  
10 Sport Research (CSR), Deakin University, Melbourne, Australia; 4) School of  
11 Medical and Health Sciences, Edith Cowan University, Joondalup, Australia; 5) Department of  
12 Exercise and Sport Science, University of North Carolina at Chapel Hill, North Carolina, USA; 6)  
13 Monash Centre for Health Research and Implementation, School of Public Health and Preventive  
14 Medicine, Monash University, Melbourne, Australia; 7) Australian Institute for Musculoskeletal  
15 Science (AIMSS), University of Melbourne, Victoria University and Western Health, Sunshine  
16 Hospital, St Albans, Australia

17

18 **Running head:** Concurrent training and skeletal muscle ribosome biogenesis

19

20 **Address for correspondence:**

21 Jackson J. Fyfe, PhD

22 School of Exercise and Nutrition Sciences

23 Deakin University

24 221 Burwood Hwy, Burwood VIC 3125

25 Email: jackson.fyfe@deakin.edu.au

26 **Keywords:** Concurrent training, ribosome biogenesis, mTORC1 signalling.

27

28

29

30

31 **1. Abstract**

32 Combining endurance training with resistance training (RT) may attenuate skeletal muscle  
33 hypertrophic adaptation versus RT alone; however, the underlying mechanisms are unclear. We  
34 investigated changes in markers of ribosome biogenesis, a process linked with skeletal muscle  
35 hypertrophy, following concurrent training versus RT performed alone. Twenty-three recreationally-  
36 active males underwent eight weeks of RT, either performed alone (RT group,  $n = 8$ ), or combined  
37 with either high-intensity interval training (HIT+RT group,  $n = 8$ ), or moderate-intensity continuous  
38 training (MICT+RT group,  $n = 7$ ). Muscle samples (*vastus lateralis*) were obtained before training,  
39 and immediately before, 1 h and 3 h after the final training session. Training-induced changes in basal  
40 expression of the 45S ribosomal RNA (rRNA) precursor, and 5.8S and 28S mature rRNAs, were  
41 greater with concurrent training versus RT alone. However, during the final training session, RT  
42 induced further increases in both mTORC1 (p70S6K1 and rps6 phosphorylation) and 45S rRNA  
43 transcription-related signalling (TIF-1A and UBF phosphorylation) versus concurrent training. These  
44 data suggest that when performed in a training-accustomed state, RT preferentially induces mTORC1  
45 and ribosome biogenesis-related signalling in human skeletal muscle versus concurrent training;  
46 however, changes in skeletal muscle ribosome biogenesis markers were more favourable following  
47 concurrent training versus RT performed alone.

48

## 49        **2. Introduction**

50 Simultaneously incorporating both resistance and endurance training into a periodised training  
51 program, termed concurrent training <sup>1</sup>, can attenuate resistance training adaptations such as muscle  
52 hypertrophy, compared with resistance training performed alone <sup>2-4</sup>. This effect is potentially mediated  
53 by an altered balance between post-exercise skeletal muscle protein synthesis (MPS) and breakdown,  
54 subsequently attenuating lean mass accretion. The mechanistic target of rapamycin complex 1  
55 (mTORC1) is a key mediator of load-induced increases in MPS and subsequently muscle hypertrophy  
56 <sup>5,6</sup>. The activity of mTORC1 is antagonised by activation of the 5' adenosine monophosphate-activated  
57 protein kinase (AMPK), which acts to restore perturbations in cellular energy balance by inhibiting  
58 anabolic cellular processes and stimulating catabolism <sup>7</sup>. For example, in rodent skeletal muscle, low-  
59 frequency electrical stimulation mimicking endurance exercise-like contractions promotes AMPK  
60 activation and inhibition of mTORC1 signalling <sup>8</sup>.

61  
62 Subsequent work in humans <sup>9-18</sup> has focused on the hypothesis that attenuated muscle hypertrophy  
63 with concurrent training <sup>2,4,19</sup> may be explained by AMPK-mediated inhibition of the mTORC1  
64 pathway. Several studies, however, have demonstrated that single sessions of concurrent exercise do  
65 not compromise either mTORC1 signalling or rates of MPS <sup>9,10,16-18</sup>, and may even potentiate these  
66 responses <sup>14</sup>, compared with resistance exercise performed alone. However, a limitation of these  
67 studies is that most have examined these responses in either untrained individuals <sup>16-18</sup> or those who  
68 are relatively unaccustomed to the exercise protocol <sup>14,20</sup>. Given short-term training increases the  
69 mode-specificity of post-exercise molecular responses <sup>21,22</sup>, examining perturbations to molecular  
70 signalling and gene expression in relatively training-unaccustomed individuals may confound any  
71 insight into the potential molecular mechanisms responsible for interference following concurrent  
72 training <sup>23</sup>.

73

74 Transient changes in translational efficiency (i.e., rates of protein synthesis per ribosome) after single  
75 sessions of concurrent exercise, as indexed by skeletal muscle mTORC1 signalling or rates of MPS,  
76 in relatively training-unaccustomed individuals therefore do not appear to explain interference to  
77 muscle hypertrophy following longer-term concurrent training. However, rates of cellular protein  
78 synthesis are determined not only by transient changes in translational efficiency, but also by cellular  
79 translational capacity (i.e., amount of translational machinery per unit of tissue, including ribosomal  
80 content)<sup>24</sup>. Ribosomes are supramolecular ribonucleoprotein complexes functioning at the heart of the  
81 translational machinery to convert mRNA transcripts into protein<sup>24</sup>, and ribosomal content dictates  
82 the upper limit of cellular protein synthesis<sup>25</sup>. Early rises in protein synthesis in response to anabolic  
83 stimuli (e.g., a single bout of resistance exercise) are generally thought to be mediated by transient  
84 activation of existing translational machinery, whereas prolonged anabolic stimuli (e.g., weeks to  
85 months of RE training) induces an increase in total translational capacity via ribosome biogenesis<sup>24</sup>.

86

87 Ribosome biogenesis is a complex, well-orchestrated process involving transcription of the  
88 polycistronic 45S rRNA (ribosomal RNA) precursor (45S pre-rRNA), processing of the 45S pre-  
89 rRNA into several smaller rRNAs (18S, 5.8S and 28S rRNAs), assembly of these rRNAs and other  
90 ribosomal proteins into ribosomal subunits (40S and 60S), and nuclear export of these ribosomal  
91 subunits into the cytoplasm<sup>24,26</sup>. The synthesis of the key components of the ribosomal subunits is  
92 achieved via the coordinated actions of three RNA polymerases (RNA Pol-I, -II, and -III). The RNA  
93 Pol-I is responsible for the transcription of the 45S pre-rRNA in the nucleolus, which is considered the  
94 rate-limiting step in ribosome biogenesis<sup>27</sup>. The 45S pre-rRNA is subsequently cleaved into the 18S,  
95 5.8S and 28S rRNAs, which undergo post-transcriptional modifications via interactions with small  
96 nuclear ribonucleoproteins and several protein processing factors. The RNA Pol-II is responsible for  
97 the transcription of ribosomal protein-encoding genes, whereas RNA Pol-III mediates the  
98 nucleoplasmic transcription of 5S rRNA and tRNAs (transfer RNAs)<sup>26</sup>.

99 As well as controlling translational efficiency, the mTORC1 is a key mediator of ribosome biogenesis  
100 by regulating transcription factors for genes encoding RNA Pol-I (see Figure 1) and -III <sup>25</sup>. The  
101 transcription of rDNA by RNA Pol-I requires the transcription factor SL-1 (selectivity factor-1), a  
102 component of which is TIF-1A (transcription initiation factor 1A; also known as RRN5), as well as  
103 other regulatory factors including POLR1B (polymerase [RNA] 1 polypeptide B). Inhibition of  
104 mTORC1 by rapamycin inactivates TIF-1A, which impairs the transcription of the 45S pre-rRNA by  
105 RNA Pol-I <sup>28</sup>. Inhibition of mTORC1 also inactivates UBF (upstream binding factor) <sup>29</sup>, a transcription  
106 factor also associated with SL-1, while the key mTORC1 substrate p70S6K1 promotes UBF activation  
107 and RNA Pol-I-mediated rDNA transcription <sup>29</sup>. As well as regulation by mTORC1 signalling, the  
108 cyclins (including cyclin-D1) and cyclin-dependent kinases (CDKs) can also regulate UBF via  
109 phosphorylation on Ser388 and Ser484, which are required for UBF activity <sup>30,31</sup>. In addition to  
110 regulation of RNA Pol-1, mTORC1 also associates with a number of RNA Pol-III genes that synthesise  
111 5S rRNA and tRNA <sup>32</sup>.

112  
113 Studies in both human <sup>33-35</sup> and rodent skeletal muscle <sup>36-41</sup> suggest ribosome biogenesis, as indexed  
114 by increases in total RNA content (>85% of which comprises rRNA) <sup>24</sup>, and increased mRNA  
115 expression of several RNA Pol-I regulatory factors, including UBF, cyclin D1 and TIF-1A, occurs  
116 concomitantly with muscle hypertrophy. In addition, attenuated rodent skeletal muscle hypertrophy  
117 with ageing <sup>35,42</sup> and rapamycin treatment <sup>40</sup> is associated with reduced markers of ribosome  
118 biogenesis, suggesting translational capacity is closely linked to the regulation of skeletal muscle mass.  
119 Despite the links between skeletal muscle hypertrophy and ribosome biogenesis <sup>24,33,34</sup>, studies  
120 investigating molecular interference following concurrent exercise in human skeletal muscle have only  
121 measured transient (<6 h) post-exercise changes in translational efficiency (as indexed by mTORC1  
122 signalling) and MPS <sup>9-18</sup>. No studies have investigated changes in ribosome biogenesis either after  
123 single bouts of concurrent exercise or following periods of concurrent training. Whether attenuated

124 muscle hypertrophy following concurrent training could be explained, at least in part, by attenuated  
125 ribosome biogenesis is unknown.

126

127 The aim of this study was therefore to investigate changes in markers of ribosome biogenesis and  
128 mTORC1 signalling after eight weeks of concurrent training compared with resistance training  
129 undertaken alone. A secondary aim was to determine the potential role of endurance training intensity  
130 in modulating skeletal muscle ribosome biogenesis adaptation to concurrent training, by comparing  
131 concurrent training incorporating either high-intensity interval training (HIT) or moderate-intensity  
132 continuous training (MICT). The induction of these responses in skeletal muscle was also investigated  
133 following a single exercise session performed post-training. It was hypothesised that compared with  
134 resistance training alone, concurrent training would attenuate the training-induced increase in markers  
135 of skeletal muscle ribosome biogenesis, and the induction of mTORC1 signalling, both at rest post-  
136 training and after a single training session performed in a training-accustomed state. It was further  
137 hypothesised that concurrent training incorporating HIT would preferentially attenuate training-  
138 induced skeletal muscle hypertrophy relative to resistance training alone, and this would be associated  
139 with an attenuation of markers of skeletal muscle ribosome biogenesis.

140

141 **\*\*\*\* INSERT FIGURE 1 ABOUT HERE \*\*\*\***

142

143

### 144 3. Results

#### 145 *Training-induced changes in maximal strength and lean body mass*

146 In brief, and as previously reported<sup>43</sup>, 1-RM leg press strength was improved from PRE-T to POST-  
147 T for RT (mean change  $\pm$ 90% confidence interval; 38.5  $\pm$ 8.5%; effect size [ES]  $\pm$ 90% confidence  
148 interval; 1.26  $\pm$ 0.24;  $P$ <0.001), HIT+RT (28.7  $\pm$ 5.3%; ES, 1.17  $\pm$ 0.19;  $P$ <0.001) and MICT+RT (27.5  
149  $\pm$ 4.6%, ES, 0.81  $\pm$ 0.12;  $P$ <0.001). However, the magnitude of this change was greater for RT vs. both  
150 HIT+RT (7.4  $\pm$ 8.7%; ES, 0.40  $\pm$ 0.40) and MICT+RT (8.2  $\pm$ 9.9%; ES, 0.60  $\pm$ 0.45). There were no  
151 substantial between-group differences in 1-RM bench press strength gain. Lower-body lean mass was  
152 similarly increased for RT (4.1  $\pm$ 2.0%; ES; 0.33  $\pm$ 0.16;  $P$ =0.023) and MICT+RT (3.6  $\pm$ 2.4%; ES; 0.45  
153  $\pm$ 0.30;  $P$ =0.052); however, this increase was attenuated for HIT+RT (1.8  $\pm$ 1.6%; ES; 0.13  $\pm$ 0.12;  
154  $P$ =0.069).

#### 155 156 *Physiological and psychological responses to the final training session*

##### 157 Heart rate and rating of perceived exertion (RPE)

158 During the final training session, there was a higher average heart rate (mean difference range, 14  $\pm$ 12  
159 to 19  $\pm$ 14 bpm; ES, 1.04  $\pm$ 0.88 to 1.22  $\pm$ 0.89;  $P$   $\leq$  0.043; Table 1) and rating of perceived exertion  
160 (RPE) (2  $\pm$ 2 to 4  $\pm$ 2 AU; ES, 1.51  $\pm$ 0.86 to 2.15  $\pm$ 0.87;  $P$   $\leq$  0.06) for HIT compared with MICT.

#### 161 162 *Venous blood lactate and glucose responses during the final training session*

163 During the final training session, venous blood lactate (Table 1) was higher for HIT compared with  
164 MICT at all time points both during cycling (mean difference range, 0.8  $\pm$ 0.5 to 4.5  $\pm$ 1.1 mmol·L<sup>-1</sup>;  
165 ES range, 1.46  $\pm$ 0.87 to 3.65  $\pm$ 0.85;  $P$   $\leq$  0.01) and during the 15-min recovery period after cycling (3.5  
166  $\pm$ 1.0 to 5.0  $\pm$ 1.2 mmol·L<sup>-1</sup>; ES, 3.11  $\pm$ 0.85 to 3.68  $\pm$ 0.85;  $P$  < 0.001). Venous blood glucose (Table 1)  
167 was also higher for HIT compared with MICT after 16, 22, 28 and 34 min cycling (0.4  $\pm$ 0.7 to 1.6  $\pm$ 0.9



168 mmol·L<sup>-1</sup>; ES, 0.54 ±0.86 to 1.52 ±0.86;  $P \leq 0.039$ ), and during the 15-min recovery period after  
169 cycling (0.9 ±0.7 to 1.8 ±1.0 mmol·L<sup>-1</sup>; ES, 1.11 ±0.85 to 1.50 ±0.85;  $P \leq 0.041$ ).

170

171 After completion of RE in the final training session, venous blood lactate (Table 2) was higher for  
172 HIT+RT compared with RT after 0, 2, 5, 10, 60, 90 and 180 min of recovery (0.1 ±0.1 to 1.4 ±0.9  
173 mmol·L<sup>-1</sup>; ES, 0.80 ±0.84 to 1.74 ±0.84;  $P \leq 0.095$ ), and higher for HIT+RT compared with MICT+RT  
174 at all timepoints (0.1 ±0.1 to 1.1 ±1.4 mmol·L<sup>-1</sup>; ES, 0.73 ±0.87 to 1.82 ±0.86;  $P \leq 0.161$ ). Post-RE  
175 venous blood glucose (Table 2) was lower for HIT+RT compared with RT after 2, 10, and 30 min of  
176 recovery (0.3 ±0.2 to 0.3 ±0.3 mmol·L<sup>-1</sup>; ES, -0.65 ±0.84 to -1.02 ±0.84;  $P \leq 0.193$ ), and higher for  
177 HIT+RT compared with RT after 60 min of recovery (0.4 ±0.4 mmol·L<sup>-1</sup>; ES, 0.88 ±0.84;  $P = 0.077$ ).  
178 Blood glucose was higher for MICT compared with HIT+RT at +30 min of recovery (0.3 ±0.2 mmol·L<sup>-1</sup>  
179 <sup>1</sup>; ES, 1.29 ±0.86;  $P = 0.021$ ), and lower for HIT+RT compared with MICT+RT at +60 min of recovery  
180 (0.2 ±0.2 mmol·L<sup>-1</sup>; ES, -1.09 ±0.85;  $P = 0.045$ ).

181

182 **\*\*\*\* INSERT TABLE 1 ABOUT HERE\*\*\*\***

183

184 **\*\*\*\* INSERT TABLE 2 ABOUT HERE\*\*\*\***

185 **Protein signalling responses**

186 *Ribosome biogenesis signalling*

187 **p-TIF-1A<sup>Ser649</sup>**. There was a main effect of time for TIF-1A<sup>Ser649</sup> phosphorylation ( $P < 0.001$ ).

188 At POST-T, TIF-1A phosphorylation was higher compared with PRE-T for HIT+RT (133  
189  $\pm 102\%$ ; ES,  $0.62 \pm 0.31$ ;  $P = 0.047$ ; Figure 2A), but unchanged for RT or MICT+RT. Compared  
190 with POST-T, TIF-1A phosphorylation was higher for RT at +1 h ( $123 \pm 79\%$ ; ES,  $0.45 \pm 0.19$ ;  
191  $P = 0.002$ ), and +3 h ( $241 \pm 315\%$ ; ES,  $0.69 \pm 0.46$ ;  $P = 0.017$ ), but unchanged for HIT+RT or  
192 MICT+RT. The change in TIF-1A phosphorylation between POST-T and +3 h was greater for  
193 RT compared with both HIT+RT ( $52 \pm 46\%$ ; ES,  $0.76 \pm 0.89$ ) and MICT+RT ( $75 \pm 24\%$ ; ES,  
194  $1.31 \pm 0.80$ ), and lower for MICT+RT vs. HIT+RT ( $-47 \pm 36\%$ ; ES,  $-0.69 \pm 0.70$ ).

195

196 **p-UBF<sup>Ser388</sup>**. There were main effects of time ( $P < 0.001$ ), group ( $P = 0.004$ ), and a time  $\times$   
197 group interaction ( $P < 0.001$ ), for changes in UBF<sup>Ser388</sup> phosphorylation. The phosphorylation  
198 of UBF<sup>Ser388</sup> was unchanged at POST-T compared with PRE-T for all training groups (see  
199 Figure 2B). Compared with POST-T, UBF phosphorylation was increased for RT at both +1 h  
200 ( $78 \pm 58\%$ ; ES,  $0.82 \pm 0.45$ ;  $P = 0.010$ ) and + 3 h ( $125 \pm 72\%$ ; ES,  $1.15 \pm 0.45$ ;  $P = 0.001$ ), but  
201 unchanged for either HIT+RT or MICT+RT. The change in UBF phosphorylation between  
202 POST-T and +1 h was greater for RT compared with both HIT+RT ( $32 \pm 23\%$ ; ES,  $0.54 \pm 0.46$ )  
203 and MICT+RT ( $37 \pm 27\%$ ; ES,  $0.61 \pm 0.55$ ), and greater between POST-T and +3 h for RT  
204 compared with both HIT+RT ( $49 \pm 17\%$ ; ES,  $0.92 \pm 0.45$ ) and MICT+RT ( $64 \pm 12\%$ ; ES,  $1.35$   
205  $\pm 0.42$ ).

206

207 **Cyclin D1 protein**. There were main effects of time ( $P < 0.001$ ) and group ( $P = 0.008$ ) for  
208 changes in cyclin D1 protein content. Protein content of cyclin D1 was unchanged between

209 PRE-T and POST-T for all training groups (Figure 2C). For HIT+RT, cyclin D1 protein content  
210 was reduced at +1 h compared with POST-T ( $-34 \pm 7\%$ ; ES,  $-0.66 \pm 0.16$ ;  $P = 0.008$ ).

211

212 **\*\*\*\* INSERT FIGURE 2 ABOUT HERE \*\*\*\***

213

214 *AMPK/mTORC1 signalling*

215 **p-AMPK<sup>Thr172</sup>**. There was a main effect of time for AMPK<sup>Thr172</sup> phosphorylation ( $P = 0.033$ ).

216 The phosphorylation of AMPK<sup>Thr172</sup> was unchanged at POST-T compared with PRE-T for all

217 training groups (Figure 3A). AMPK phosphorylation was, however, increased at +1 h

218 compared with POST-T for RT ( $78 \pm 72\%$ ; ES,  $0.34 \pm 0.23$ ;  $P = 0.031$ ). The change in AMPK

219 phosphorylation between POST-T and +3 h was also greater for RT compared with MICT+RT

220 ( $59 \pm 44\%$ ; ES,  $0.79 \pm 0.83$ ) but not HIT+RT ( $54 \pm 49\%$ ; ES,  $0.69 \pm 0.83$ ).

221

222 **p-ACC<sup>Ser79</sup>**. There was a time  $\times$  group interaction for ACC<sup>Ser79</sup> phosphorylation ( $P = 0.04$ ).

223 The phosphorylation of ACC<sup>Ser79</sup> was unchanged at POST-T compared with PRE-T for all

224 training groups (Figure 3B). Compared with POST-T, ACC phosphorylation was reduced at

225 +1 h for both RT ( $-36 \pm 22\%$ ; ES,  $-0.28 \pm 0.20$ ;  $P = 0.026$ ) and MICT+RT ( $46 \pm 20\%$ ; ES,  $-0.56$

226  $\pm 0.33$ ;  $P = 0.016$ ), and reduced at +3 h compared with POST-T for RT ( $45 \pm 20\%$ ; ES,  $-0.37$

227  $\pm 0.22$ ;  $P = 0.012$ ). Compared with RT, the change in ACC phosphorylation was also greater

228 for HIT+RT between POST-T and both +1 h ( $99 \pm 100\%$ ; ES,  $0.65 \pm 0.46$ ) and +3 h ( $169$

229  $\pm 168\%$ ; ES,  $0.94 \pm 0.56$ ).

230

231 **p-mTOR<sup>Ser2448</sup>**. There was a main effect of time for mTOR<sup>Ser2448</sup> phosphorylation ( $P = 0.001$ ).

232 The phosphorylation of mTOR<sup>Ser2448</sup> was unchanged at POST-T compared with PRE-T for all

233 training groups (Figure 3C). Compared with POST-T, mTOR phosphorylation was increased

234 at +1 h for RT ( $105 \pm 137\%$ ; ES,  $0.46 \pm 0.40$ ;  $P = 0.048$ ), but not for either HIT+RT ( $30 \pm 71\%$ ;  
235 ES,  $0.32 \pm 0.62$ ;  $P = 0.320$ ) or MICT+RT ( $77 \pm 184\%$ ; ES,  $0.37 \pm 0.59$ ;  $P = 0.218$ ), and increased  
236 at +3 h for compared with POST-T for HIT+RT ( $70 \pm 45\%$ ; ES,  $0.64 \pm 0.31$ ;  $P = 0.030$ ). There  
237 were no substantial between-group differences in mTOR phosphorylation at any time point.

238

239 **p-p70S6K1<sup>Thr389</sup>**. There was a main effect of time for p70S6K1<sup>Thr389</sup> phosphorylation ( $P <$   
240  $0.001$ ). The phosphorylation of p70S6K1<sup>Thr389</sup> was increased at POST-T compared with PRE  
241 for HIT+RT ( $95 \pm 47\%$ ; ES,  $0.66 \pm 0.24$ ;  $P = 0.024$ ; Figure 3D), but not for RT or MICT+RT.  
242 Compared with POST-T, p70S6K1 phosphorylation was increased by RT at +1 h ( $78 \pm 77\%$ ;  
243 ES,  $0.51 \pm 0.37$ ;  $P = 0.026$ ) but was unchanged for HIT+RT or MICT+RT. The change in  
244 p70S6K1 phosphorylation between POST-T and +3 h was also substantially greater for RT  
245 compared with both HIT+RT ( $47 \pm 50\%$ ; ES,  $0.86 \pm 1.13$ ) and MICT+RT ( $50 \pm 46\%$ ; ES,  $0.88$   
246  $\pm 1.05$ ).

247

248 **p-rps6<sup>Ser235/236</sup>**. There was a main effect of time for rps6<sup>Ser235/236</sup> phosphorylation ( $P < 0.001$ ).  
249 The phosphorylation of rps6<sup>Ser235/236</sup> was unchanged at POST-T compared with PRE-T for all  
250 training groups (Figure 3E). Compared with POST-T, rps6 phosphorylation was increased for  
251 all training groups at +1 h (RT:  $700 \pm 678\%$ ; ES,  $0.75 \pm 0.28$ ;  $P < 0.001$ ; HIT+RT:  $475 \pm 572\%$ ;  
252 ES,  $0.66 \pm 0.33$ ;  $P = 0.005$ ; MICT+RT:  $621 \pm 420\%$ ; ES,  $1.49 \pm 0.42$ ;  $P < 0.001$ ) and +3 h (RT:  
253  $967 \pm 1047\%$ ; ES,  $0.85 \pm 0.31$ ;  $P < 0.001$ ; HIT+RT:  $294 \pm 319\%$ ; ES,  $0.51 \pm 0.28$ ;  $P = 0.006$ ;  
254 MICT+RT:  $176 \pm 200\%$ ; ES,  $0.76 \pm 0.51$ ;  $P = 0.026$ ). The change in rps6 phosphorylation  
255 between POST-T and +3 h was, however, substantially greater for RT compared with  
256 MICT+RT ( $74 \pm 29\%$ ; ES,  $0.72 \pm 0.51$ ) but not HIT+RT ( $63 \pm 41\%$ ; ES,  $0.57 \pm 0.56$ ).

257

258 **p-4E-BP1<sup>Thr56/47</sup>**. There was a main effect of group for 4E-BP1<sup>Thr36/47</sup> phosphorylation ( $P <$   
259 0.001; Figure 3F); however, there were no between-group differences in 4E-BP1<sup>Thr36/47</sup>  
260 phosphorylation at any time point.

261

262 **\*\*\*\* INSERT FIGURE 3 ABOUT HERE \*\*\*\***

263

264 *Ribosomal RNA (rRNA) responses*

265 **Total RNA content.** Total RNA content was used as an index of total translational capacity of  
266 skeletal muscle, since ribosomal RNA comprises over 85% of the total RNA pool<sup>44</sup>. There  
267 was a time  $\times$  group interaction for changes in total RNA content ( $P = 0.008$ ). At PRE, total  
268 RNA content was higher for RT compared with both HIT+RT ( $38 \pm 17\%$ ; ES,  $-1.48 \pm 0.84$ ;  $P =$   
269  $0.005$ ; Table 3) and MICT+RT ( $25 \pm 12\%$ ; ES,  $1.47 \pm 0.85$ ;  $P = 0.010$ ). Total RNA content  
270 decreased between PRE-T and POST-T for RT ( $-11 \pm 5\%$ ; ES,  $-0.17 \pm 0.09$ ;  $P = 0.025$ ).  
271 Conversely, total RNA content was not substantially changed between PRE-T and POST-T for  
272 both HIT+RT ( $32 \pm 18\%$ ; ES,  $0.30 \pm 0.15$ ;  $P = 0.077$ ) and MICT+RT ( $20 \pm 15\%$ ; ES,  $0.12 \pm 0.08$ ;  
273  $P = 0.083$ ). The PRE-T to POST-T change in total RNA content was, however, greater for both  
274 HIT+RT ( $48 \pm 39\%$ ; ES,  $1.14 \pm 0.76$ ) and MICT+RT ( $34 \pm 24\%$ ; ES,  $1.24 \pm 0.75$ ) compared with  
275 RT.

276

277 **\*\*\*\* INSERT TABLE 3 ABOUT HERE \*\*\*\***

278

279 **45S pre-rRNA.** There was a main effect of time for changes in 45S pre-rRNA expression ( $P$   
280  $< 0.001$ ). Expression of 45S pre-rRNA was unchanged at POST-T compared with PRE-T for  
281 all training groups (Figure 4); however, the change in 45S pre-rRNA expression between PRE-  
282 T and POST-T was greater for both HIT+RT ( $58 \pm 76\%$ ; ES,  $0.71 \pm 0.71$ ) and MICT+RT ( $75$   
283  $\pm 81\%$ ; ES,  $0.85 \pm 0.68$ ) compared with RT. There were no substantial changes nor between-

284 group differences in 45S pre-rRNA expression between POST-T and +3 h for either training  
285 group.

286

287 **\*\*\*\* INSERT FIGURE 4 ABOUT HERE \*\*\*\***

288

289 **5.8S rRNA (mature).** There was a main effect of time for changes in 5.85S rRNA expression  
290 ( $P = 0.004$ ). Expression of 5.85S rRNA was reduced at POST-T compared with PRE-T for RT  
291 ( $-51 \pm 16\%$ ; ES,  $-0.69 \pm 0.31$ ;  $P = 0.017$ ; Figure 5A). The change in 5.8S rRNA expression  
292 between PRE-T and POST-T was also greater for both HIT+RT ( $125 \pm 109\%$ ; ES,  $1.27 \pm 0.73$ )  
293 and MICT+RT ( $120 \pm 111\%$ ; ES,  $0.99 \pm 0.61$ ) compared with RT. There were no substantial  
294 changes in 5.8S rRNA expression between POST-T and +3 h for either training group.

295

296 **5.8S rRNA (span).** There was a time  $\times$  group interaction for changes in 5.85S (span) rRNA  
297 expression ( $P = 0.008$ ). Expression of 5.8S rRNA (span) was reduced at POST-T compared  
298 with PRE-T for RT ( $-36 \pm 15\%$ ; ES,  $-0.51 \pm 0.27$ ;  $P = 0.027$ ; Figure 5B). The change in 5.8S  
299 rRNA (span) expression between PRE-T and POST-T was also greater for HIT+RT compared  
300 with RT ( $112 \pm 116\%$ ; ES,  $1.40 \pm 0.97$ ).

301

302 **18S rRNA (mature).** There was a main effect of group for changes in 5.85S rRNA expression  
303 ( $P = 0.049$ ). Expression of 18S rRNA was, however, not substantially different at any time  
304 point, nor were there any substantial between-group differences in changes in 18S rRNA  
305 expression (Figure 5C).

306

307 **18S rRNA (span).** There were no substantial effects of training or any between-group  
308 differences in changes in 18S rRNA (span) expression (Figure 5D), although a small increase

309 in 18S rRNA (span) expression was noted at +3 h compared with POST-T for MICT+RT (63  
310  $\pm 48\%$ ; ES,  $0.21 \pm 0.12$ ;  $P = 0.029$ ).

311

312 **28S rRNA (mature).** Expression of 28S rRNA was reduced at POST-T compared with PRE-  
313 T for RT ( $-33 \pm 15\%$ ; ES,  $-0.49 \pm 0.28$ ;  $P = 0.037$ ; Figure 5E); however, this effect was only  
314 possibly substantial. The change in 28S rRNA expression between PRE-T and POST-T was  
315 also greater for both HIT+RT ( $73 \pm 56\%$ ; ES,  $1.23 \pm 0.71$ ;  $P = 0.007$ ) and MICT+RT ( $63 \pm 55\%$ ;  
316 ES,  $1.10 \pm 0.74$ ;  $P = 0.023$ ) compared with RT. There were no substantial changes in 28S rRNA  
317 expression between POST-T and +3 h for either training group.

318

319 **28S rRNA (span).** There was a main effect of group for changes in 28S rRNA (span)  
320 expression ( $P < 0.001$ ). There were no substantial changes in 28S rRNA (span) expression  
321 between PRE-T and POST-T for either training group (Figure 5F). However, the change in 28S  
322 rRNA (span) expression between PRE-T and POST-T was greater for HIT+RT compared with  
323 RT ( $123 \pm 109\%$ ; ES,  $0.81 \pm 0.48$ ).

324

325 **\*\*\*\* INSERT FIGURE 5 ABOUT HERE \*\*\*\***

326

327 *mRNA responses*

328 **TIF-1A mRNA.** There was a main effect of time for changes in TIF-1A mRNA expression ( $P$   
329  $= 0.008$ ). Expression of TIF-1A mRNA was unchanged at POST-T compared with PRE-T for  
330 all training groups (Figure 6A). Compared with POST-T, TIF-1A expression was increased at  
331 +3 h for both RT ( $26 \pm 12\%$ ; ES,  $0.53 \pm 0.21$ ;  $P = 0.003$ ) and MICT+RT ( $36 \pm 35\%$ ; ES,  $0.59$   
332  $\pm 0.50$ ;  $P = 0.038$ ), but not HIT+RT. There were no substantial between-group differences in  
333 changes in TIF-1A expression.

334

335 **UBF mRNA.** There were main effects of time ( $P = 0.008$ ) and group ( $P = 0.039$ ) for changes  
336 in UBF mRNA expression. Expression of UBF mRNA was unchanged at POST-T compared  
337 with PRE-T for all training groups (Figure 6B). There were no substantial changes in UBF  
338 expression between POST-T and +3 h for either training group.

339

340 **POLR1B mRNA.** There were main effects of time ( $P = 0.001$ ) and a time  $\times$  group interaction  
341 ( $P = 0.007$ ) for changes in POLR1B mRNA expression. Expression of POLR1B mRNA was  
342 reduced at POST-T compared with PRE-T for RT ( $-26 \pm 16\%$ ; ES,  $-0.44 \pm 0.32$ ;  $P = 0.026$ ;  
343 Figure 6C). Compared with POST-T, POLR1B expression was increased at +3 h for both  
344 HIT+RT ( $44 \pm 42\%$ ; ES,  $0.57 \pm 0.44$ ;  $P = 0.047$ ) and MICT+RT ( $48 \pm 43\%$ ; ES,  $0.51 \pm 0.37$ ;  $P$   
345  $= 0.033$ ), but unchanged for RT. The change in POLR1B mRNA expression between both  
346 PRE-T -POST-T ( $37 \pm 30\%$ ; ES,  $0.87 \pm 0.60$ ) and POST-T +3 h ( $34 \pm 51\%$ ; ES,  $0.81 \pm 1.03$ )  
347 was greater for HIT+RT vs. RT.

348

349 **Cyclin D1 mRNA.** There was a main effect of time for changes in cyclin D1 mRNA expression  
350 ( $P = 0.007$ ). Expression of cyclin D1 mRNA was increased for HIT+RT at POST-T compared  
351 with PRE-T ( $101 \pm 54\%$ ; ES,  $0.59 \pm 0.22$ ;  $P = 0.001$ ; Figure 6D). There were no substantial  
352 changes in cyclin D1 mRNA expression between POST-T and +3 h for either training group.

353

354 **\*\*\*\* INSERT FIGURE 6 ABOUT HERE \*\*\*\***

355

356 **MuRF-1 mRNA.** There were main effects of time ( $P = 0.004$ ) and a time  $\times$  group interaction  
357 ( $P = 0.019$ ) for changes in MuRF-1 mRNA expression. Expression of MuRF-1 mRNA was  
358 unchanged at POST-T compared with PRE for all training groups (Figure 7A). Compared with



359 POST-T, MuRF-1 expression was increased at +3 h for HIT+RT ( $206 \pm 163\%$ ; ES,  $1.35 \pm 0.61$ ;  
360  $P = 0.003$ ), but unchanged for either MICT+RT and RT. The change in MuRF-1 expression  
361 between POST-T and +3 h was greater for HIT+RT compared with both RT ( $168 \pm 176\%$ ; ES,  
362  $2.15 \pm 1.34$ ) and MICT+RT ( $60 \pm 34\%$ ; ES,  $1.85 \pm 1.56$ ).

363

364 **Atrogin-1 mRNA.** There were main effects of time ( $P = 0.028$ ) and a time  $\times$  group interaction  
365 ( $P = 0.049$ ) for changes in Atrogin-1 mRNA expression. Atrogin-1 mRNA content was  
366 unchanged at POST-T compared with PRE for all training groups (Figure 7B). Compared with  
367 POST-T, Atrogin-1 expression was reduced at +3 h for RT ( $-44 \pm 22\%$ ; ES,  $-0.91 \pm 0.60$ ;  $P =$   
368  $0.018$ ), but not substantially changed for either HIT+RT or MICT+RT. The reduction in  
369 Atrogin-1 mRNA expression between POST-T and +3 h was greater for RT compared with  
370 both HIT+RT ( $-89 \pm 83\%$ ; ES,  $-1.22 \pm 0.82$ ) and MICT+RT ( $-86 \pm 89\%$ ; ES,  $-1.14 \pm 0.85$ ).

371

372 **Fox-O1 mRNA.** There was a main effect of time for changes in Fox-O1 mRNA expression ( $P$   
373  $= 0.004$ ). The mRNA levels of Fox-O1 was between PRE-T and POST-T for RT ( $28 \pm 17\%$ ;  
374 ES,  $0.49 \pm 0.27$ ;  $P = 0.051$ ), but unchanged for HIT+RT and MICT+RT (Figure 7C). At +3 h,  
375 Fox-O1 mRNA was increased compared with POST-T only for HIT+RT ( $158 \pm 65\%$ ; ES,  $0.59$   
376  $\pm 0.16$ ;  $P < 0.001$ ). The change in Fox-O1 mRNA expression between POST-T and +3 h was  
377 also substantially greater for HIT+RT compared with both RT ( $141 \pm 73\%$ ; ES,  $0.80 \pm 0.27$ ) and  
378 MICT+RT ( $47 \pm 31\%$ ; ES,  $0.54 \pm 0.47$ ).

379

380 **PGC-1 $\alpha$  mRNA.** There were main effects of time ( $P < 0.001$ ), group ( $P < 0.001$ ), and a time  
381  $\times$  group interaction ( $P < 0.001$ ), for changes in PGC-1 $\alpha$  mRNA expression (Figure 7D).  
382 Compared with POST-T, PGC-1 $\alpha$  mRNA expression was increased at +3 h for both HIT+RT  
383 ( $826 \pm 349\%$ ; ES,  $4.58 \pm 0.76$ ;  $P < 0.001$ ) and MICT+RT ( $590 \pm 481\%$ ; ES,  $1.97 \pm 0.66$ ;  $P =$

384 0.001), but unchanged for RT. The change in PGC-1 $\alpha$  mRNA expression between POST-T and  
385 +3 h was greater for both HIT+RT (635  $\pm$ 360%; ES, 4.80  $\pm$ 1.14) and MICT+RT (447  $\pm$ 379%;  
386 ES, 2.75  $\pm$ 1.05) compared with RT.

387

388 **\*\*\*\* INSERT FIGURE 7 ABOUT HERE \*\*\*\***

389

### 390 *Muscle fibre CSA responses*

391 Type I muscle fibre CSA (see Table 3) was increased at POST-T compared with PRE-T for  
392 RT (15  $\pm$ 13%; ES, 0.10  $\pm$ 0.08;  $P = 0.035$ ), but was not substantially changed for either HIT+RT  
393 (-23  $\pm$ 19%; ES, -0.09  $\pm$ 0.08;  $P = 0.135$ ) or MICT+RT (0.4  $\pm$ 17%; ES, 0.00  $\pm$ -0.14;  $P = 0.989$ ).  
394 The training-induced change in type I fibre CSA was also substantially greater for RT  
395 compared with HIT+RT (34  $\pm$ 22%; ES, 1.03  $\pm$ 0.80), but not MICT+RT (15  $\pm$ 54%; ES, 0.39  
396  $\pm$ 1.45).

397

398 Type II muscle fibre CSA (see Table 3) was not substantially changed between PRE-T and  
399 POST-T for either RT (19  $\pm$ 27%; ES, 0.09  $\pm$ 0.12;  $P = 0.139$ ), HIT+RT (0.4  $\pm$ 24%; ES, 0.00  
400  $\pm$ 0.08;  $P = 0.974$ ) or MICT+RT (16  $\pm$ 14%; ES, 0.19  $\pm$ 0.16;  $P = 0.344$ ). There were no  
401 substantial differences in the training-induced changes in type II fibre CSA. Representative  
402 immunohistochemical images are shown in Figure 8.

403

404 **\*\*\*\* INSERT FIGURE 8 ABOUT HERE \*\*\*\***

405

#### 406        **4. Discussion**

407 Previous investigations on molecular responses and adaptations in skeletal muscle to  
408 concurrent training have focused almost exclusively on markers of enhanced post-exercise  
409 translational efficiency (i.e., mTORC1 signalling and rates of MPS) <sup>9-18</sup>. For the first time, we  
410 present data on the regulation of translational capacity (i.e., ribosome biogenesis) with  
411 concurrent training relative to resistance training performed alone, including regulators of RNA  
412 Pol-I-mediated rDNA transcription, and changes in expression levels of the 45S rRNA  
413 precursor and mature rRNA species (i.e., 5.8S, 18S, and 28S). The major findings were that  
414 although a single bout of resistance exercise, when performed in a training-accustomed state,  
415 further increased mTORC1 signalling and the phosphorylation of RNA Pol-I regulatory factors  
416 (TIF-1A and UBF) compared with concurrent training, this was not associated with increased  
417 basal expression of either the 45S rRNA precursor or mature rRNA species. Rather, changes  
418 in total RNA content and expression of mature rRNAs (i.e., 5.8S, 28S) tended to be greater  
419 following concurrent exercise, regardless of the endurance training intensity employed. These  
420 observations contrast with our findings regarding training-induced changes in muscle fibre-  
421 type specific hypertrophy, which was greater in type I muscle fibres for the resistance training  
422 group, suggesting a disconnect between training-induced changes in markers of ribosome  
423 biogenesis and skeletal muscle hypertrophy.

424

425 We employed a post-training exercise trial to investigate potential interference to mTORC1  
426 signalling following exercise protocols that participants were accustomed to via eight weeks of  
427 prior training. This was to overcome the limitation that most studies examining molecular  
428 responses in skeletal muscle following a single concurrent exercise session have employed  
429 untrained or relatively training-unaccustomed participants <sup>14,16-18</sup>. In contrast to previous  
430 investigations <sup>14,16-18</sup>, we observed further enhanced mTORC1 signalling after resistance

431 training compared with concurrent exercise, including increased mTOR and p70S6K1  
432 phosphorylation at 1 h post-exercise, and elevated rps6 phosphorylation at +3 h. These  
433 observations contrast with previous data, including our own <sup>20</sup>, showing no differences in  
434 mTORC1 signalling between single bouts of either resistance exercise, either performed alone  
435 or following a bout of continuous endurance exercise <sup>13</sup>. It has been suggested that any small  
436 tendency for mTORC1 signalling responses (e.g., p70S6K<sup>Thr389</sup> phosphorylation) to be  
437 enhanced by concurrent exercise (relative to resistance exercise alone) before training, as  
438 shown in a previous study <sup>14</sup>, were attenuated when exercise was performed in a training-  
439 accustomed state <sup>13</sup>. Taken together, these data lend support to the notion the molecular signals  
440 initiated in skeletal muscle by exercise become more mode-specific with repeated training, and  
441 increases in post-exercise mTORC1 signalling with concurrent exercise may be attenuated  
442 when performed in a training-accustomed state.

443

444 While the observed mTORC1 signalling responses were consistent with the paradigm of  
445 enhanced mode-specificity of molecular responses with repeated training, the finding of greater  
446 AMPK phosphorylation following resistance exercise compared with concurrent exercise was  
447 unexpected, given the energy-sensing nature of AMPK signalling and its purported role in  
448 promoting an oxidative skeletal muscle phenotype <sup>45</sup>. This observation may suggest an adaptive  
449 response whereby endurance training rendered subjects in the concurrent training groups less  
450 susceptible to exercise-induced metabolic perturbation in skeletal muscle, manifesting in an  
451 attenuated post-exercise AMPK phosphorylation response. A similar phenomenon has been  
452 observed in human skeletal muscle after only 10 days of endurance training, whereby post-  
453 exercise increases in AMPK activity following a single pre-training exercise bout are  
454 attenuated compared with the same exercise bout performed before training <sup>46</sup>. The present data

455 suggest further work is required to further define the mode-specificity of AMPK signalling in  
456 skeletal muscle and the effect of repeated training on the induction of these responses.

457

458 In addition to mediating transient changes in translational efficiency, accumulating evidence  
459 suggests mTORC1 also plays a critical role in regulating ribosome biogenesis (and therefore  
460 translational capacity) in skeletal muscle by regulating all three classes of RNA polymerases  
461 (RNA Pol-I to -III)<sup>25</sup>. Inhibition of mTORC1 by rapamycin leads to the inactivation of TIF-  
462 1A, which impairs the recruitment of RNA Pol-I-associated transcription-initiation complexes  
463 mediating the transcription of 45S pre-rRNA genes<sup>28</sup>. The key mTORC1 substrate p70S6K1  
464 also plays a role in mediating Pol-I activity via its interaction with UBF, a transcription factor  
465 that interacts with the RNA Pol-I machinery via SL-1<sup>29</sup>. In agreement with mTORC1  
466 signalling responses, the phosphorylation of upstream regulators of RNA Pol-I-mediated  
467 rDNA transcription, including UBF and TIF-1A, was increased more by resistance exercise  
468 alone than when combined with either HIT or MICT. Previous work has demonstrated single  
469 sessions of resistance exercise to induce robust increases in TIF-1A Ser<sup>649</sup> phosphorylation and  
470 UBF protein content in human skeletal muscle at 1 h post-exercise, both in untrained and  
471 trained states<sup>34</sup>. Moreover, whereas a single session of resistance exercise did not impact upon  
472 UBF Ser<sup>388</sup> phosphorylation, this response was elevated in the basal state post-training<sup>34</sup>. The  
473 present data add to the growing body of evidence that resistance exercise is a potent stimulus  
474 for increasing the phosphorylation of regulators of Pol-I-mediated rDNA transcription, and  
475 suggest these early signalling responses may be similarly attenuated when resistance exercise  
476 is combined with endurance exercise in the form of either HIT or MICT.

477

478 The regulation of several Pol-I associated proteins was also measured at the transcriptional  
479 level, including TIF-1A, POLR1B, UBF, and cyclin D1. Concurrent exercise, irrespective of

480 endurance training intensity, was a sufficient stimulus for increasing POLR1B mRNA  
481 expression at 3 h post-exercise, but only MICT+RT and RT alone increased TIF-1A mRNA  
482 content at this timepoint. Previous work in human skeletal muscle has demonstrated no effect  
483 of a single session of resistance exercise performed in either untrained or trained states on the  
484 mRNA expression of either TIF-1A or POLR1B at either 1 h<sup>34</sup> or 4 h<sup>33</sup> post-exercise. Eight  
485 weeks of resistance training has previously been shown to increase basal UBF mRNA  
486 expression, which was reduced 1 h following a single session of resistance exercise performed  
487 post-training<sup>34</sup>. Although there were no basal training-induced increases in UBF mRNA  
488 expression for any training group in the present study, a similar reduction in UBF mRNA  
489 content was noted 3 h post-exercise for the RT group. Increased cyclin D1 mRNA was also  
490 seen at rest post-training for the HIT+RT group, which was maintained at 3 h post-exercise.  
491 Figueiredo et al.<sup>34</sup> have shown eight weeks of resistance training decreased post-training levels  
492 of cyclin D1 mRNA compared with pre-training, with a small increase induced at 1 h post-  
493 exercise by a single session of post-training resistance exercise. It therefore appears HIT is a  
494 more potent stimulus for increasing levels of cyclin D1 mRNA compared with resistance  
495 exercise alone or MICT, although an acute reduction in cyclin D1 protein levels was also seen  
496 1 h following a single bout of HIT+RT. Previous work has shown increases in cyclin D1 mRNA  
497 during long-term (3 months) resistance training<sup>47</sup>, which may suggest an increase in satellite  
498 cell activation and proliferation during the training intervention<sup>47,48</sup>, although direct measures  
499 of these markers were not made in the present study.

500

501 Despite the present findings regarding signalling responses upstream of 45S pre-rRNA  
502 transcription, the expression of 45S pre-rRNA, but not mature ribosome species, was increased  
503 only by a single session of concurrent exercise and not by resistance exercise alone. Previous  
504 work in humans has reported basal increases in 45S pre-rRNA after 8 weeks of resistance

505 training<sup>34</sup>, and 4 h after a single session of resistance exercise performed in both untrained and  
506 trained states<sup>33</sup>. Notably, post-exercise expression of 45S pre-rRNA was less pronounced in  
507 the trained compared with untrained state<sup>33</sup>. While no substantial basal changes in 45S pre-  
508 rRNA expression were observed in the present study, the change in 45S pre-rRNA levels  
509 between PRE-T and POST-T was greater for both concurrent training groups compared with  
510 RT performed alone. Concurrent exercise also increased 45S pre-rRNA levels at 3 h post-  
511 exercise, with little effect of single-mode resistance exercise. These observations may be  
512 explained by the muscle sampling timepoints employed in the present study. Increased post-  
513 exercise 45S pre-rRNA levels have been previously shown at a later timepoint of 4 h after  
514 resistance exercise<sup>33</sup>, whereas a reduction in 45S rRNA levels has been demonstrated 1 h post-  
515 resistance exercise in trained, but not untrained, states<sup>34</sup>. The possibility therefore exists that  
516 resistance exercise may increase 45S rRNA expression at a later timepoint post-exercise, and  
517 the sampling time points employed herein were not extensive enough to measure any exercise-  
518 induced increases in 45S pre-rRNA expression.

519

520 The effects of training on the basal expression of mature ribosome species 5.8S, 18S, and 28S  
521 were also investigated, as well as early post-exercise changes in mature rRNA expression.  
522 Contrary to our hypothesis, resistance training alone induced small decreases in the levels of  
523 both the 5.8S and 28S rRNAs in the basal state post-training, while the training-induced change  
524 in both of these rRNAs was greater with concurrent exercise compared with resistance training  
525 alone. Neither training protocol induced any changes in 18S rRNA expression. Previous work  
526 has observed basal increases in 5.8S, 18S, and 28S rRNA expression in human skeletal muscle  
527 after 8 weeks of resistance training, all of which were reduced 1 h following a single session  
528 of resistance exercise performed post-training<sup>34</sup>. The present data contrast with these findings  
529 by suggesting that in parallel with training-induced changes in total RNA content, resistance

530 training performed alone was an insufficient stimulus to increase mature rRNA content,  
531 whereas concurrent exercise was sufficient to increase mature 5.8S and 28S expression after a  
532 single post-training exercise session.

533

534 The rRNA primers used in the present study were specifically designed to differentiate between  
535 mature rRNA expression and the expression of these sequences when still bound to the  
536 polycistronic 45S rRNA precursor (i.e., 5.8S, 18S and 28S [span] rRNA)<sup>34</sup>. Using identical  
537 primers as the present study, previous work has shown basal training-induced increases in  
538 mature rRNA expression did not occur concomitantly with likewise increased expression of  
539 rRNA transcripts still bound to the 45S precursor (i.e., 5.8S, 18S and 28S [span]), suggesting  
540 a training-induced increase in mature rRNA content, rather than simply increased 45S  
541 precursor expression<sup>34</sup>. In contrast, we observed simultaneous post-exercise increases in the  
542 expression of both mature rRNA transcripts and those still bound to the 45S precursor (i.e.,  
543 ‘span’ rRNA transcripts). It is therefore possible our observed changes in these markers may  
544 be reflective solely of changes in 45S pre-rRNA content, and not the mature forms of these  
545 rRNAs. However, it is also possible this may relate to the post-exercise time course examined  
546 in the present study. In support of this notion, it was shown that a single session of resistance  
547 exercise was sufficient to increase only the expression of rRNA transcripts still bound to the  
548 45S pre-rRNA, and not mature rRNA species, even after 48 h of post-exercise recovery<sup>49</sup>. It  
549 is therefore plausible that the post-exercise time courses examined in the present study were  
550 not extensive enough to measure early post-exercise changes in mature rRNA expression.  
551 Clearly, further work is required to investigate the time course of rRNA regulation with training  
552 in human skeletal muscle.

553



554 Consistent with the training-induced changes in both 5.8S and 28S rRNA expression with  
555 resistance training performed alone, we observed a small reduction in basal total RNA content  
556 in skeletal muscle within this cohort. Despite this paradoxical finding, it is interesting to note  
557 total RNA content was higher at PRE-T for the RT group compared with both the HIT+RT and  
558 MICT groups (1.6- and 1.3-fold, respectively). The reason for this between-group discrepancy  
559 at baseline is not immediately clear, given we previously showed no differences in baseline  
560 lean mass measured via DXA or lower-body 1-RM strength in these participants<sup>43</sup>, suggesting  
561 other factors may have influenced the between-group differences in baseline skeletal muscle  
562 RNA content. It is also possible that the training program provided an insufficient stimulus to  
563 at least maintain this elevated basal RNA content for the RT group. Studies demonstrating  
564 robust increases in total RNA content concomitantly with rodent skeletal muscle hypertrophy  
565 typically employ supraphysiological methods for inducing muscle hypertrophy, such as  
566 synergist ablation<sup>36,39,50,51</sup>, a stimulus clearly not replicated by resistance training in human  
567 models. Participant training status may also impact upon training-induced changes in ribosome  
568 biogenesis in humans. The participants in the present study were actively engaging in resistance  
569 and/or endurance exercise for at least 1 year prior to commencing the study, suggesting a higher  
570 training status compared with those of Figueiredo et al. (2015) (although this was not made  
571 explicitly clear, and participants were asked to refrain from resistance training for 3 weeks prior  
572 to the study<sup>34</sup>). It is also possible that between-group differences in training volume, which  
573 was clearly higher for the concurrent training groups compared with the RT group, may have  
574 impacted upon the training-induced changes in total skeletal muscle RNA content.

575

576 Despite the changes in skeletal muscle RNA content, resistance training alone was sufficient  
577 to increase type I, but not type II, muscle fibre CSA. The lack of any substantial type II fibre  
578 hypertrophy is likely due, at least in part, to the specific nature of the resistance training

579 program employed, which was perhaps better-oriented for enhancing maximal strength rather  
580 than lean mass<sup>43</sup>. Indeed, previously-published data indicates that the resistance training  
581 protocol employed in the present study was effective in improving maximal strength and  
582 measures of lean mass<sup>43</sup>, although these changes did not transfer to detectable type II fibre  
583 hypertrophy. Nevertheless, in agreement with previous research<sup>2,4</sup>, the training-induced  
584 increase in type I muscle fibre CSA was attenuated with concurrent exercise, albeit only when  
585 incorporating HIT, compared with resistance training performed alone. Despite these between-  
586 group differences in fibre-type specific hypertrophy, we could find no evidence that the  
587 training-induced changes in lean mass or muscle fibre CSA were correlated with changes in  
588 total RNA content of skeletal muscle (data not shown). The apparent disconnect between  
589 training-induced changes in total RNA content and markers of muscle hypertrophy, both at the  
590 whole-body and muscle-fibre levels, suggests further investigation is required into relationship  
591 between changes in translational capacity and resistance training-induced hypertrophy in  
592 human skeletal muscle, particularly in the context of concurrent training.

593

594 As skeletal muscle mass accretion is ultimately determined by the net balance between MPS  
595 and protein degradation<sup>52</sup>, the expression of ubiquitin ligases purported to mediate muscle  
596 protein breakdown<sup>53</sup> was also measured as proxy markers of protein degradation. Concurrent  
597 exercise incorporating HIT has previously been shown to exacerbate the expression of MuRF-  
598 1 relative to resistance exercise performed alone<sup>9</sup>, while we previously reported similar  
599 increases in MuRF-1 mRNA expression 3 h after a single bout of concurrent exercise  
600 incorporating either HIT or MICT in relatively training-unaccustomed individuals<sup>20</sup>.  
601 Conversely, when performed in the trained state, the present data suggest only the HIT protocol  
602 was sufficient to induce elevated MuRF-1 expression after subsequent resistance exercise,  
603 relative to resistance exercise either performed alone or in combination with MICT. While the

604 role of Atrogin-1 in mediating protein degradation is less clear compared with MuRF-1<sup>54</sup>, we  
605 nevertheless observed a reduction in Atrogin-1 expression at +3 h for resistance exercise, but  
606 not for either concurrent exercise group. These data are consistent with previous reports of  
607 reduced Atrogin-1 expression 3 h after resistance exercise performed in both untrained and  
608 trained states<sup>13</sup>, but contrast others showing reduced Atrogin-1 expression 3 h after resistance  
609 exercise only when preceded 6 h earlier by MICT (40 min cycling at 70% of peak power output)  
610<sup>14</sup>. Taken together, these data suggest concurrent exercise incorporating HIT may exacerbate  
611 post-exercise rates of protein degradation by increasing MuRF-1 mRNA expression, while both  
612 concurrent exercise protocols prevented the acute reduction in Atrogin-1 expression induced  
613 by resistance exercise alone. These data should, however, be considered with recent evidence  
614 suggesting increased rates of protein degradation may be necessary to promote skeletal muscle  
615 remodelling and be permissive, rather than inhibitory, for training adaptations in skeletal  
616 muscle<sup>55</sup>.

617

### 618 *Conclusions*

619 This is the first study to simultaneously investigate markers of ribosome biogenesis and  
620 mTORC1 signalling in human skeletal muscle following concurrent training compared with  
621 single-mode resistance training. Contrary to our hypotheses, and recent work in humans<sup>33,34</sup>,  
622 we noted little evidence of ribosome biogenesis in skeletal muscle following eight weeks of  
623 resistance training. Rather, increases in markers of ribosome biogenesis, albeit small in  
624 magnitude, tended to be greater following concurrent exercise and were independent of the  
625 endurance training intensity employed. This occurred despite a single session of resistance  
626 exercise being a more potent stimulus for both mTORC1 signalling and phosphorylation of  
627 regulators of RNA Pol-1-mediated rDNA transcription (i.e., TIF-1A and UBF), when  
628 performed post-training. An apparent disconnect was noted between training-induced changes

629 in muscle fibre CSA, of which the small increase in type I fibre CSA induced by resistance  
630 training was attenuated when combined with HIT, and changes in total skeletal muscle RNA  
631 content. Overall, the present data suggest single-mode resistance exercise performed in a  
632 training-accustomed state preferentially induces mTORC1 and ribosome biogenesis-related  
633 signalling in skeletal muscle compared with concurrent exercise; however, this is not associated  
634 with basal post-training increases in markers of ribosome biogenesis. The observation that both  
635 mTORC1 and ribosome biogenesis-related signalling were impaired in response to the final  
636 training session of the study for both forms of concurrent exercise, relative to resistance  
637 exercise performed alone, suggests resistance training may become a more potent stimulus for  
638 ribosome biogenesis and muscle hypertrophy if training were continued long-term. Further  
639 work in human exercise models that stimulate more robust skeletal muscle hypertrophy (e.g.,  
640 high-volume resistance training performed to failure), together with longer training periods,  
641 may be required to further elucidate the role of ribosome biogenesis in adaptation to resistance  
642 training, and subsequently any potential interference to these responses with concurrent  
643 training.  
644

645 **5. Methods**

646 *Ethical approval*

647 All study procedures were approved by the Victoria University Human Research Ethics  
648 Committee (HRE 13-309). After being fully informed of study procedures and screening for  
649 possible exclusion criteria, participants provided written informed consent. All methods were  
650 performed in accordance with the relevant guidelines and regulations of the Victoria University  
651 Human Research Ethics Committee.

652

653 *Experimental overview*

654 Participant details and procedures performed in this study have been previously described <sup>43</sup>;  
655 however, these are briefly summarised as follows. The study employed a repeated-measures,  
656 parallel-group design (Figure 9A). After preliminary testing for maximal (one-repetition  
657 maximum [1-RM]) strength, aerobic fitness ( $\dot{V}O_{2\text{peak}}$ , the lactate threshold [LT] and peak  
658 aerobic power [ $W_{\text{peak}}$ ]), and body composition (dual-energy x-ray absorptiometry [DXA]),  
659 participants were ranked by baseline 1-RM leg press strength and randomly allocated to one of  
660 three training groups. Each group performed training sessions that consisted of either 1) high-  
661 intensity interval training (HIT) cycling combined with resistance training (HIT+RT group,  $n$   
662 = 8), 2) moderate-intensity continuous training (MICT) cycling combined with resistance  
663 training (MICT+RT group,  $n = 7$ ) or 3) resistance training performed alone (RT group,  $n = 8$ ).

664

665 After preliminary testing, and immediately prior to the first training session (i.e., at least 72 h  
666 after completion of preliminary testing), a resting muscle biopsy (PRE-T) was obtained from  
667 the *vastus lateralis* using the percutaneous needle biopsy technique <sup>56</sup> modified with suction <sup>57</sup>.  
668 Participants then completed 8 weeks of group-specific training performed three times per week.  
669 Between 48 and 72 h after completing the post-training 1-RM strength testing, participants

670 underwent a final group-specific training session (Figure 9B) whereby early post-exercise  
671 molecular responses in skeletal muscle were measured in a training-accustomed state. Three  
672 additional biopsies [at rest (POST-T), and 1 h (+1 h) and 3 h (+3 h) post-exercise] were  
673 obtained during the final group-specific training session.

674

675 **\*\*\*\* INSERT FIGURE 9 ABOUT HERE \*\*\*\***

676

677 *Training intervention*

678 The training intervention in this study has previously been described in detail <sup>43</sup>. Briefly,  
679 participants began the 8-week training intervention 3 to 5 days after completion of preliminary  
680 testing. All training groups performed an identical resistance training program on non-  
681 consecutive days (typically Monday, Wednesday, and Friday), with the HIT+RT and  
682 MICT+RT groups completing the corresponding form of endurance exercise 10 min prior to  
683 commencing each resistance training session.

684

685 *Final training session*

686 Two or three days after completion of the training intervention and post-testing, participants  
687 performed a final group-specific training session (Figure 9B) whereby early post-exercise  
688 skeletal muscle responses were measured in a training-accustomed state. Participants reported  
689 to the laboratory after an overnight (~8-10 h) fast. After resting quietly for ~15 min upon arrival  
690 at the laboratory, a venous catheter was inserted into an antecubital forearm vein and a resting  
691 blood sample was obtained. A resting, post-training (POST-T) muscle biopsy was then taken  
692 from the *vastus lateralis* muscle (described subsequently). Participants in the RT group waited  
693 quietly for 10 min after the POST-T biopsy and then completed a standardised resistance  
694 exercise protocol (8 x 5 leg press repetitions at 80% of the post-training 1RM, three minutes of

695 recovery between sets). Participants in the HIT+RT and MICT+RT groups preceded the  
696 standardised RT with either HIT (10 x 2-min intervals at 140% of the post-training LT, 1 min  
697 passive recovery between intervals) or work- and duration-matched MICT cycling (30 min at  
698 93.3% post-training LT), respectively. Fifteen minutes of passive recovery was allowed  
699 between completion of either HIT or MICT and the subsequent resistance exercise bout. Each  
700 cycling bout was performed after a standardised warm-up ride at 75 W for 5 min. After  
701 completion of resistance exercise, participants rested quietly in the laboratory and additional  
702 biopsies were obtained after 1 (+1 h) and 3 h (+3 h) of recovery. Venous blood samples were  
703 also obtained at regular intervals during cycling and following recovery from both cycling and  
704 resistance exercise (Figure 9B).

705

#### 706 *Muscle sampling*

707 After administration of local anaesthesia (1% Xylocaine), a small incision (~7 mm in length)  
708 was made through the skin, subcutaneous tissue, and fascia overlying the *vastus lateralis*  
709 muscle for each subsequent biopsy. A 5-mm Bergström needle was then inserted into the  
710 muscle and a small portion of muscle tissue (~50-400 mg) removed. All biopsies were obtained  
711 from separate incision sites in a distal-to-proximal fashion on the same leg as the pre-training  
712 biopsy. Muscle samples were blotted on filter paper to remove excess blood, immediately  
713 frozen in liquid nitrogen, and stored at -80°C until subsequent analysis. A small portion of  
714 each biopsy sample (~20 mg) was embedded in Tissue-Tek (Sakura, Finetek, NL), frozen in  
715 liquid nitrogen-cooled isopentane, and stored at -80°C for subsequent immunofluorescence  
716 analysis.

717

718

719

720 *Western blotting*

721 Approximately 5 mg of frozen muscle tissue was homogenised in lysis buffer (0.125M Tris-  
722 HCl, 4% SDS, 10% Glycerol, 10mM EGTA, 0.1M DTT, 1% protease/phosphatase inhibitor  
723 cocktail), left for 1 h at room temperature, and then stored overnight at -80°C. The following  
724 morning, samples were thawed and the protein concentration determined (Red 660 Protein  
725 Assay Kit, G-Biosciences, St. Louis, MO). Bromophenol blue (0.1%) was then added to each  
726 sample, which were then stored at -80°C until subsequent analysis. Proteins (8 µg) were  
727 separated by SDS-PAGE using 6-12% acrylamide pre-cast gels (TGX Stain Free, Bio-Rad  
728 laboratories, Hercules, CA) in 1× running buffer (25 mM Tris, 192 mM Glycine, 0.1% SDS),  
729 and transferred to polyvinylidene fluoride (PVDF) membranes (Bio-Rad laboratories, Hercules,  
730 CA) using a semi-dry transfer system (Trans Blot Turbo, Bio-Rad laboratories, Hercules, CA)  
731 for 7 min at 25 V. After transfer, membranes were blocked with 5% skim milk in 1×TBST (200  
732 mM Tris, 1.5 M NaCl, 0.05% Tween 20) for 1 h at room temperature, washed with 1×TBST  
733 (5×5 min), and incubated with primary antibody solution (5% BSA [bovine serum albumin],  
734 0.05% Na Azide in 1×TBST) overnight at 4°C. Primary antibodies for phosphorylated (p-) p-  
735 mTOR<sup>Ser2448</sup> (1:1000; #5536), mTOR (1:1000), p-p70S6K1<sup>Thr389</sup> (1:1000; #9234), p70S6K1  
736 (1:1000), p-4E-BP1<sup>Thr37/46</sup> (1:1000; #2855), 4E-BP1 (1:1000; #9452), p-AMPK<sup>Thr172</sup> (1:1000;  
737 #2535), AMPK (1:1000; #2532), p-rps6<sup>Ser235/236</sup> (1:750; #4856), rps6 (1:1000; #2217) and p-  
738 ACC<sup>Ser79</sup> (1:1000; #3661) were from Cell Signalling Technology (Danvers, MA), p-UBF<sup>Ser388</sup>  
739 (1:1000; sc-21637-R), UBF (1:000; sc-9131) and cyclin D1 (1:1000; sc-450) were from Santa  
740 Cruz Biotechnology (Dallas, TX), and p-RRN3 (TIF-1A)<sup>Ser649</sup> (1:1000; ab138651) and TIF-1A  
741 (1:1000; ab70560) were from Abcam (Cambridge, UK). The following morning, membranes  
742 were washed again with 1×TBST and incubated with a secondary antibody (Perkin Elmer,  
743 Waltham, MA, #NEF812001EA; 1:50000 or 1:100000 in 5% skim milk and 1×TBST) for 1 h  
744 at room temperature. After washing again with 1×TBST, proteins were detected with



745 chemiluminescence (SuperSignal™ West Femto Maximum Sensitivity Substrate, Thermo  
746 Fisher Scientific, Waltham, MA) and quantified via densitometry (Image Lab 5.0, Bio-Rad  
747 laboratories, Hercules, CA). Representative western blot images for each protein target  
748 analysed are shown in Figure 10. All sample timepoints for each participant were run on the  
749 same gel and normalised to both an internal pooled sample present on each gel, and the total  
750 protein content of each lane using a stain-free imaging system (Chemi Doc™ MP, Bio-Rad  
751 laboratories, Hercules, CA). Phosphorylated proteins were then expressed relative to the total  
752 amount of each respective protein.

753

754 **\*\*\*\* INSERT FIGURE 10 ABOUT HERE \*\*\*\***

755

756 *Real-time quantitative PCR (qPCR)*

757 *RNA extraction*

758 Total RNA ( $1145 \pm 740$  ng; mean  $\pm$  SD) was extracted from approximately 25 mg of muscle  
759 tissue using TRI Reagent® (Sigma Aldrich, St. Louis, MO) according to the manufacturer's  
760 protocol. Muscle samples were firstly homogenised in 500  $\mu$ L of TRI Reagent® using a Tissue  
761 Lyser II and 5 mm stainless steel beads (Qiagen, Venlo, Limburg, Netherlands) for 120 s at 30  
762 Hz. After resting for 5 min on ice, 50  $\mu$ L of 1-bromo-3-chloropropane (BCP) was added to the  
763 tube, inverted for 30 s to mix, and then rested for 10 min at room temperature. The homogenate  
764 was then centrifuged for 15 min at 13,000 rpm and the upper transparent phase transferred to  
765 another tube. Isopropanol (400  $\mu$ L) was added to the tube, inverted briefly to mix, and stored  
766 overnight at  $-20^{\circ}\text{C}$  to precipitate the RNA. After overnight incubation, the solution was  
767 centrifuged for 60 min at 13,000 rpm and at  $4^{\circ}\text{C}$  to pellet the RNA. The RNA pellet was washed  
768 twice by centrifugation in 75% ethanol/nuclease-free water (NFW) for 15 min at 13,000 rpm,  
769 allowed to air-dry, and then dissolved in 15  $\mu$ L of NFW (Ambion Inc., Austin, TX). The

770 quantity and quality of RNA was subsequently determined using a spectrophotometer  
771 (NanoDrop One, Thermo Scientific, Wilmington, DE). The purity of RNA was assessed using  
772 the ratio between the absorbance at 260 nm and absorbance at 280 nm (mean  $\pm$  SD;  $2.37 \pm$   
773  $0.43$ ), and the ratio between the absorbance at 260 nm and absorbance at 230 nm ( $1.71 \pm 0.42$ ).  
774 The total skeletal muscle RNA concentration was calculated based on the total RNA yield  
775 relative to the wet weight of the muscle sample.

776

#### 777 *Reverse transcription*

778 For mRNA analysis, first-strand cDNA was generated from 1  $\mu$ g RNA in 20  $\mu$ L reaction buffer  
779 using the iScript<sup>®</sup> cDNA synthesis kit (Bio-Rad laboratories, Hercules, CA) according to  
780 manufacturer's protocol, with each reaction comprising 4  $\mu$ L 5 $\times$  iScript reaction mix, 1  $\mu$ L  
781 iScript Reverse Transcriptase, 5  $\mu$ L NFW and 10  $\mu$ L of RNA sample (100 ng/ $\mu$ L). Reverse  
782 transcription was then performed with the following conditions: 5 min at 25°C to anneal  
783 primers, 30 min at 42°C for the extension phase, and 5 min at 85°C. Following reverse  
784 transcription, samples were DNase-treated (Life Technologies, Carlsbad, CA) and cDNA was  
785 stored at -20°C until further analysis.

786

#### 787 *Real-time quantitative PCR (qPCR)*

788 Real-time PCR was performed using a Realplex<sup>2</sup> PCR system (Eppendorf, Hamburg,  
789 Germany) to measure mRNA levels of MuRF-1 (muscle RING-finger 1), Atrogin-1 (muscle  
790 atrophy f-box), FoxO1 (forkhead box-O1), PGC-1 $\alpha$  (peroxisome proliferator-activated gamma  
791 receptor co-activator-1 alpha), UBF, TIF-1A, cyclin D1, POLR1B, and commonly used  
792 reference genes GAPDH (glyceraldehyde 3-phosphate dehydrogenase), cyclophilin (also  
793 known as peptidyl-prolylcis-trans isomerase),  $\beta$ 2M (beta-2 microglobulin) and TBP (TATA  
794 binding protein). Target rRNAs were the mature ribosome species 5.8S, 18S and 28S. Since

795 primers specific for these mature rRNA sequences will also amplify pre-rRNA transcripts (i.e.,  
796 the 45S pre-rRNA), we used specifically designed primers (QIAGEN, Venlo, Limburg, The  
797 Netherlands) to distinguish between mature rRNA species and those still bound to the 45S pre-  
798 rRNA transcript, as previously described<sup>34</sup>. Briefly, primers were designed specifically for  
799 pre-rRNA sequences spanning the 5' end external/internal transcribed spacer regions (ETS and  
800 ITS, respectively) of the 45S pre-rRNA transcript and the internal regions of mature rRNA  
801 sequences (i.e., 18S-ETS, 5.8S-ITS, and 28S-ETS). For clarity, primers amplifying the mature  
802 rRNA transcripts are henceforth designated as 'mature' transcripts (e.g., 18S rRNA [mature]),  
803 as opposed to those primers amplifying rRNA sequences bound to the 45S rRNA precursor,  
804 henceforth designated as 'span' transcripts (e.g., 18S rRNA [span]). A specific primer for the  
805 initial region of the 5' end of the 45S pre-rRNA transcript was used to measure 45S pre-rRNA  
806 expression levels<sup>34</sup>. Standard and melting curves were performed for all primers to ensure both  
807 single-product and amplification efficiency. Details for all primers used are provided in Table  
808 4 (mRNA) and Table 5 (rRNA).

809

810 **\*\*\*\* INSERT TABLE 4 ABOUT HERE \*\*\*\***

811

812 **\*\*\*\* INSERT TABLE 5 ABOUT HERE \*\*\*\***

813

814 Each PCR reaction was performed in duplicate using a robotic pipetting machine (EpMotion  
815 2100, Eppendorf, Hamburg, Germany) in a final reaction volume of 10  $\mu$ L containing 5.0  $\mu$ L  
816 2 $\times$  SYBR green (Bio-Rad Laboratories, Hercules, CA), 0.6  $\mu$ L PCR primers (diluted to 15  $\mu$ M;  
817 Sigma Aldrich, St. Louis, MO), 0.4  $\mu$ L NFW and 4  $\mu$ L cDNA sample (diluted to 5 ng/ $\mu$ L).  
818 Conditions for the PCR reactions were: 3 min at 95°C, 40 cycles of 15 sec at 95°C/1 min at  
819 60°C, one cycle of 15 sec at 95°C/15 sec at 60°C, and a ramp for 20 min to 95°C. Each plate

820 was briefly centrifuged before loading into the PCR machine. To compensate for variations in  
821 input RNA amounts and efficiency of the reverse transcription, mRNA data were quantified  
822 using the  $2^{-\Delta\Delta CT}$  method<sup>58</sup> and normalised to the geometric mean<sup>59</sup> of the three most stable  
823 housekeeping genes analysed (cyclophilin,  $\beta 2M$  and TBP), determined as previously  
824 described<sup>60</sup>.

825

### 826 *Immunohistochemistry*

827 Muscle cross-sections (10  $\mu M$ ) were cut at  $-20^{\circ}C$  using a cryostat (Microm HM 550, Thermo  
828 Fisher Scientific, Waltham, MA), mounted on uncoated glass slides, and air-dried for 20 min  
829 at room temperature. Sections were then rinsed briefly with 1 $\times$ PBS (0.1M; Sigma Aldrich, St  
830 Louis, MO), fixed with cold paraformaldehyde (4% in 1 $\times$ PBS) for 10 min at room temperature,  
831 rinsed three times with 1 $\times$ PBS, incubated in 0.5% TritonX in 1 $\times$ PBS for 5 min at room  
832 temperature, rinsed again three times with 1 $\times$ PBS, and then blocked for 1 h at room temperature  
833 in a 3% BSA solution in 1 $\times$ PBS. After blocking, sections were then incubated with a primary  
834 antibody for myosin heavy chain type I (A4.840, Developmental Studies Hybridoma Bank,  
835 University of Iowa, IA), diluted 1:25 in 3% BSA/PBS overnight at  $4^{\circ}C$ . The following  
836 morning, sections were washed four times in 1 $\times$ PBS for 10 min each, before incubating with a  
837 secondary antibody (Alexa Fluor<sup>®</sup> 488 conjugate Goat anti-mouse IgM, cat. no. A-21042,  
838 Thermo Fisher Scientific, Waltham, MA) diluted 1:200 in 3% BSA/PBS for 2 h at room  
839 temperature. Sections were again washed four times in 1 $\times$ PBS for 10 min each, before  
840 incubation with Wheat Germ Agglutinin (WGA) (Alexa Fluor<sup>®</sup> 594 Conjugate; cat. no.  
841 W11262, Thermo Fisher Scientific, Waltham, MA), diluted to 1:100 in 1 $\times$ PBS (from a 1.25  
842 mg/mL stock solution), for 15 min at room temperature. Sections were washed again 4 times  
843 with 1 $\times$ PBS for 3 min each, blotted dry with a Kim-Wipe, and Flourosshield<sup>TM</sup> (cat. no. F6182;  
844 Sigma Aldrich, St Louis, MO) added to each section before the coverslip was mounted. Stained

845 muscle sections were air-dried for ~2 h and viewed with an Olympus BX51 microscope  
846 coupled with an Olympus DP72 camera for fluorescence detection (Olympus, Shinjuku,  
847 Japan). Images were captured with a 10× objective and analysed using Image Pro Premier  
848 software (version 9.1; Media Cybernetics, Rockville, MD). Analysis was completed by an  
849 investigator blinded to all groups and time points. For each subject, muscle fibre CSA was  
850 determined for both type I and type II muscle fibres. For the RT, HIT+RT and MICT+RT  
851 groups, a total of  $107 \pm 61$ ,  $112 \pm 67$ , and  $84 \pm 73$  (mean  $\pm$  SD) type I fibres and  $154 \pm 72$ ,  $136$   
852  $\pm 80$ , and  $144 \pm 76$  (mean  $\pm$  SD) type II fibres were included for analysis, respectively.

853

#### 854 *Statistical analyses*

855 The effect of training group on outcomes was analysed using a combination of both traditional  
856 and magnitude-based statistical analyses. Western blot, qPCR and immunohistochemistry data  
857 were log-transformed before analysis to reduce non-uniformity of error<sup>61</sup>. Data were firstly  
858 analysed via a two-way (time  $\times$  group) analysis of variance with repeated-measures (RM-  
859 ANOVA) (SPSS, Version 21, IBM Corporation, New York, NY). To quantify the magnitude  
860 of within- and between-group differences for dependent variables, a magnitude-based approach  
861 to inferences using the standardised difference (effect size, ES) was used<sup>61</sup>. The magnitude of  
862 effects were defined according to thresholds suggested by Hopkins<sup>61</sup>, whereby  $<0.2$  = trivial,  
863  $0.2-0.6$  = small,  $0.6-1.2$  = moderate,  $1.2-2.0$  = large,  $2.0-4.0$  = very large and  $>4.0$  = extremely  
864 large effects. Lacking information on the smallest meaningful effect for changes in protein  
865 phosphorylation and gene expression, the threshold for the smallest worthwhile effect was  
866 defined as an ES of 0.4, rather than the conventional threshold of 0.2<sup>20</sup>. Magnitude-based  
867 inferences about effects were made by qualifying the effects with probabilities reflecting the  
868 uncertainty in the magnitude of the true effect<sup>62</sup>. Effects that were deemed substantial in  
869 magnitude (and therefore meaningful) were those at least 75% 'likely' to exceed the smallest

870 worthwhile effect (according to the overlap between the uncertainty in the magnitude of the  
871 true effect and the smallest worthwhile change <sup>62</sup>). Exact *P* values were also determined for  
872 each comparison, derived from paired (for within-group comparisons) or unpaired (for  
873 between-group comparisons) *t*-tests, with a Bonferroni correction applied to correct for  
874 multiple comparisons (SPSS, Version 21, IBM Corporation, New York, NY). A summary of  
875 all within- and between-group comparisons for this study are presented in supplementary tables  
876 1 and 2, respectively. Physiological (blood lactate, blood glucose, heart rate) and psychological  
877 (rating of perceived exertion [RPE]) responses to exercise are reported as mean values  $\pm$  SD,  
878 whereas protein phosphorylation and gene expression data are reported as mean within- and  
879 between-condition percentage differences  $\pm$ 90 % CL.

880

#### 881 *Data availability*

882 The datasets generated during and/or analysed during the current study are available from the  
883 corresponding author upon reasonable request.

884

885

## 886 6. References

- 887 1 Leveritt, M., Abernethy, P. J., Barry, B. K. & Logan, P. A. Concurrent strength and  
888 endurance training. A review. *Sports Med* **28**, 413-427 (1999).
- 889 2 Kraemer, W. J. *et al.* Compatibility of high-intensity strength and endurance training  
890 on hormonal and skeletal muscle adaptations. *J Appl Physiol* **78**, 976-989 (1995).
- 891 3 Hickson, R. C. Interference of strength development by simultaneously training for  
892 strength and endurance. *Eur J Appl Physiol Occup Physiol* **45**, 255-263 (1980).
- 893 4 Bell, G. J., Syrotuik, D., Martin, T. P., Burnham, R. & Quinney, H. A. Effect of  
894 concurrent strength and endurance training on skeletal muscle properties and hormone  
895 concentrations in humans. *Eur J Appl Physiol* **81**, 418-427 (2000).
- 896 5 Bodine, S. C. *et al.* Akt/mTOR pathway is a crucial regulator of skeletal muscle  
897 hypertrophy and can prevent muscle atrophy in vivo. *Nat Cell Biol* **3**, 1014-1019,  
898 doi:10.1038/ncb1101-1014 (2001).
- 899 6 Drummond, M. J. *et al.* Rapamycin administration in humans blocks the contraction-  
900 induced increase in skeletal muscle protein synthesis. *J Physiol* **587**, 1535-1546,  
901 doi:10.1113/jphysiol.2008.163816 (2009).
- 902 7 Kimball, S. R. Interaction between the AMP-activated protein kinase and mTOR  
903 signaling pathways. *Med Sci Sports Exerc* **38**, 1958-1964,  
904 doi:10.1249/01.mss.0000233796.16411.13 (2006).
- 905 8 Atherton, P. J. *et al.* Selective activation of AMPK-PGC-1 $\alpha$  or PKB-TSC2-  
906 mTOR signaling can explain specific adaptive responses to endurance or resistance  
907 training-like electrical muscle stimulation. *FASEB J* **19**, 786-788, doi:10.1096/fj.04-  
908 2179fje (2005).
- 909 9 Apro, W. *et al.* Resistance exercise-induced S6K1 kinase activity is not inhibited in  
910 human skeletal muscle despite prior activation of AMPK by high-intensity interval  
911 cycling. *Am J Physiol Endocrinol Metab* **308**, E470-481,  
912 doi:10.1152/ajpendo.00486.2014 (2015).
- 913 10 Apro, W., Wang, L., Ponten, M., Blomstrand, E. & Sahlin, K. Resistance exercise  
914 induced mTORC1 signalling is not impaired by subsequent endurance exercise in  
915 human skeletal muscle. *Am J Physiol Endocrinol Metab* **305**, E22-32,  
916 doi:10.1152/ajpendo.00091.2013 (2013).
- 917 11 Coffey, V. G. *et al.* Effect of consecutive repeated sprint and resistance exercise bouts  
918 on acute adaptive responses in human skeletal muscle. *Am J Physiol Regul Integr*  
919 *Comp Physiol* **297**, R1441-1451, doi:00351.2009 [pii] (2009).
- 920 12 Coffey, V. G., Pilegaard, H., Garnham, A. P., O'Brien, B. J. & Hawley, J. A.  
921 Consecutive bouts of diverse contractile activity alter acute responses in human  
922 skeletal muscle. *J Appl Physiol* **106**, 1187-1197, doi:91221.2008 [pii] (2009).
- 923 13 Fernandez-Gonzalo, R., Lundberg, T. R. & Tesch, P. A. Acute molecular responses in  
924 untrained and trained muscle subjected to aerobic and resistance exercise training  
925 versus resistance training alone. *Acta Physiol (Oxf)* **209**, 283-294,  
926 doi:10.1111/apha.12174 (2013).
- 927 14 Lundberg, T. R., Fernandez-Gonzalo, R., Gustafsson, T. & Tesch, P. A. Aerobic  
928 exercise alters skeletal muscle molecular responses to resistance exercise. *Med Sci*  
929 *Sports Exerc* **44**, 1680-1688, doi:10.1249/MSS.0b013e318256f8e8 (2012).
- 930 15 Lundberg, T. R., Fernandez-Gonzalo, R. & Tesch, P. A. Exercise-induced AMPK  
931 activation does not interfere with muscle hypertrophy in response to resistance  
932 training in men. *J Appl Physiol (1985)* **116**, 611-620,  
933 doi:10.1152/jappphysiol.01082.2013 (2014).

- 934 16 Donges, C. E. *et al.* Concurrent resistance and aerobic exercise stimulates both  
935 myofibrillar and mitochondrial protein synthesis in sedentary middle-aged men. *J*  
936 *Appl Physiol* **112**, 1992-2001, doi:jappphysiol.00166.2012 [pii] (2012).
- 937 17 Pugh, J. K., Faulkner, S. H., Jackson, A. P., King, J. A. & Nimmo, M. A. Acute  
938 molecular responses to concurrent resistance and high-intensity interval exercise in  
939 untrained skeletal muscle. *Physiological reports* **3**, doi:10.14814/phy2.12364 (2015).
- 940 18 Carrithers, J. A., Carroll, C. C., Coker, R. H., Sullivan, D. H. & Trappe, T. A.  
941 Concurrent exercise and muscle protein synthesis: implications for exercise  
942 countermeasures in space. *Aviat Space Environ Med* **78**, 457-462 (2007).
- 943 19 Wilson, J. M. *et al.* Concurrent training: a meta-analysis examining interference of  
944 aerobic and resistance exercises. *J Strength Cond Res* **26**, 2293-2307,  
945 doi:10.1519/JSC.0b013e31823a3e2d (2012).
- 946 20 Fyfe, J. J., Bishop, D. J., Zacharewicz, E., Russell, A. P. & Stepto, N. K. Concurrent  
947 exercise incorporating high-intensity interval or continuous training modulates  
948 mTORC1 signalling and microRNA expression in human skeletal muscle. *Am J*  
949 *Physiol Regul Integr Comp Physiol*, ajpregu 00479 02015,  
950 doi:10.1152/ajpregu.00479.2015 (2016).
- 951 21 Vissing, K. *et al.* Differentiated mTOR but not AMPK signaling after strength vs  
952 endurance exercise in training-accustomed individuals. *Scand J Med Sci Sports* **23**,  
953 355-366, doi:10.1111/j.1600-0838.2011.01395.x (2011).
- 954 22 Wilkinson, S. B. *et al.* Differential effects of resistance and endurance exercise in the  
955 fed state on signalling molecule phosphorylation and protein synthesis in human  
956 muscle. *J Physiol* **586**, 3701-3717, doi:jphysiol.2008.153916 [pii] (2008).
- 957 23 Fyfe, J. J., Bishop, D. J. & Stepto, N. K. Interference between Concurrent Resistance  
958 and Endurance Exercise: Molecular Bases and the Role of Individual Training  
959 Variables. *Sports Med* **44**, 743-762, doi:10.1007/s40279-014-0162-1 (2014).
- 960 24 Chaillou, T., Kirby, T. J. & McCarthy, J. J. Ribosome biogenesis: emerging evidence  
961 for a central role in the regulation of skeletal muscle mass. *Journal of cellular*  
962 *physiology* **229**, 1584-1594, doi:10.1002/jcp.24604 (2014).
- 963 25 Iadevaia, V., Liu, R. & Proud, C. G. mTORC1 signaling controls multiple steps in  
964 ribosome biogenesis. *Seminars in cell & developmental biology* **36**, 113-120,  
965 doi:10.1016/j.semcdb.2014.08.004 (2014).
- 966 26 Thomson, E., Ferreira-Cerca, S. & Hurt, E. Eukaryotic ribosome biogenesis at a  
967 glance. *J Cell Sci* **126**, 4815-4821, doi:10.1242/jcs.111948 (2013).
- 968 27 Moss, T. & Stefanovsky, V. Y. Promotion and regulation of ribosomal transcription in  
969 eukaryotes by RNA polymerase I. *Progress in nucleic acid research and molecular*  
970 *biology* **50**, 25-66 (1995).
- 971 28 Mayer, C., Zhao, J., Yuan, X. & Grummt, I. mTOR-dependent activation of the  
972 transcription factor TIF-IA links rRNA synthesis to nutrient availability. *Genes Dev*  
973 **18**, 423-434, doi:10.1101/gad.285504 (2004).
- 974 29 Hannan, K. M. *et al.* mTOR-dependent regulation of ribosomal gene transcription  
975 requires S6K1 and is mediated by phosphorylation of the carboxy-terminal activation  
976 domain of the nucleolar transcription factor UBF. *Mol Cell Biol* **23**, 8862-8877  
977 (2003).
- 978 30 Voit, R. & Grummt, I. Phosphorylation of UBF at serine 388 is required for  
979 interaction with RNA polymerase I and activation of rDNA transcription. *Proc Natl*  
980 *Acad Sci U S A* **98**, 13631-13636, doi:10.1073/pnas.231071698 (2001).
- 981 31 Voit, R., Hoffmann, M. & Grummt, I. Phosphorylation by G1-specific cdk-cyclin  
982 complexes activates the nucleolar transcription factor UBF. *EMBO J* **18**, 1891-1899,  
983 doi:10.1093/emboj/18.7.1891 (1999).



- 984 32 Kantidakis, T., Ramsbottom, B. A., Birch, J. L., Dowding, S. N. & White, R. J.  
985 mTOR associates with TFIIC, is found at tRNA and 5S rRNA genes, and targets  
986 their repressor Maf1. *Proc Natl Acad Sci U S A* **107**, 11823-11828,  
987 doi:10.1073/pnas.1005188107 (2010).
- 988 33 Nader, G. A. *et al.* Resistance exercise training modulates acute gene expression  
989 during human skeletal muscle hypertrophy. *J Appl Physiol (1985)* **116**, 693-702,  
990 doi:10.1152/jappphysiol.01366.2013 (2014).
- 991 34 Figueiredo, V. C. *et al.* Ribosome biogenesis adaptation in resistance training-induced  
992 human skeletal muscle hypertrophy. *Am J Physiol Endocrinol Metab* **309**, E72-83,  
993 doi:10.1152/ajpendo.00050.2015 (2015).
- 994 35 Stec, M. J., Mayhew, D. L. & Bamman, M. M. The effects of age and resistance  
995 loading on skeletal muscle ribosome biogenesis. *J Appl Physiol (1985)* **119**, 851-857,  
996 doi:10.1152/jappphysiol.00489.2015 (2015).
- 997 36 von Walden, F., Casagrande, V., Ostlund Farrants, A. K. & Nader, G. A. Mechanical  
998 loading induces the expression of a Pol I regulon at the onset of skeletal muscle  
999 hypertrophy. *Am J Physiol Cell Physiol* **302**, C1523-1530,  
1000 doi:10.1152/ajpcell.00460.2011 (2012).
- 1001 37 Chaillou, T. *et al.* Hypoxia transiently affects skeletal muscle hypertrophy in a  
1002 functional overload model. *Am J Physiol Regul Integr Comp Physiol* **302**, R643-654,  
1003 doi:10.1152/ajpregu.00262.2011 (2012).
- 1004 38 Chaillou, T., Lee, J. D., England, J. H., Esser, K. A. & McCarthy, J. J. Time course of  
1005 gene expression during mouse skeletal muscle hypertrophy. *J Appl Physiol (1985)*  
1006 **115**, 1065-1074, doi:10.1152/jappphysiol.00611.2013 (2013).
- 1007 39 Miyazaki, M., McCarthy, J. J., Fedele, M. J. & Esser, K. A. Early activation of  
1008 mTORC1 signalling in response to mechanical overload is independent of  
1009 phosphoinositide 3-kinase/Akt signalling. *J Physiol* **589**, 1831-1846,  
1010 doi:10.1113/jphysiol.2011.205658 (2011).
- 1011 40 Goodman, C. A. *et al.* The role of skeletal muscle mTOR in the regulation of  
1012 mechanical load-induced growth. *J Physiol* **589**, 5485-5501,  
1013 doi:10.1113/jphysiol.2011.218255 (2011).
- 1014 41 Adams, G. R., Caiozzo, V. J., Haddad, F. & Baldwin, K. M. Cellular and molecular  
1015 responses to increased skeletal muscle loading after irradiation. *Am J Physiol Cell*  
1016 *Physiol* **283**, C1182-1195, doi:10.1152/ajpcell.00173.2002 (2002).
- 1017 42 Kirby, T. J. *et al.* Blunted hypertrophic response in aged skeletal muscle is associated  
1018 with decreased ribosome biogenesis. *J Appl Physiol (1985)* **Aug 15;119**, 321-327,  
1019 doi:10.1152/jappphysiol.00296.2015 (2015).
- 1020 43 Fyfe, J. J., Bartlett, J. D., Hanson, E. D., Stepto, N. K. & Bishop, D. J. Endurance  
1021 training intensity does not mediate interference to maximal lower-body strength gain  
1022 during short-term concurrent training. *Frontiers in physiology* **Nov 3;7**,  
1023 doi:10.3389/fphys.2016.00487 (2016).
- 1024 44 Haddad, F., Baldwin, K. M. & Tesch, P. A. Pretranslational markers of contractile  
1025 protein expression in human skeletal muscle: effect of limb unloading plus resistance  
1026 exercise. *J Appl Physiol (1985)* **98**, 46-52, doi:10.1152/jappphysiol.00553.2004  
1027 (2005).
- 1028 45 McGee, S. L. & Hargreaves, M. AMPK-mediated regulation of transcription in  
1029 skeletal muscle. *Clin Sci (Lond)* **118**, 507-518, doi:CS20090533 [pii] (2010).
- 1030 46 McConell, G. K. *et al.* Short-term exercise training in humans reduces AMPK  
1031 signalling during prolonged exercise independent of muscle glycogen. *J Physiol* **568**,  
1032 665-676, doi:jphysiol.2005.089839 [pii] (2005).

- 1033 47 Kadi, F. *et al.* The effects of heavy resistance training and detraining on satellite cells  
1034 in human skeletal muscles. *J Physiol* **558**, 1005-1012,  
1035 doi:10.1113/jphysiol.2004.065904 (2004).
- 1036 48 Adams, G. R., Haddad, F. & Baldwin, K. M. Time course of changes in markers of  
1037 myogenesis in overloaded rat skeletal muscles. *J Appl Physiol (1985)* **87**, 1705-1712  
1038 (1999).
- 1039 49 Figueiredo, V. C. *et al.* Impact of resistance exercise on ribosome biogenesis is  
1040 acutely regulated by post-exercise recovery strategies. *Physiological reports* **4**,  
1041 doi:10.14814/phy2.12670 (2016).
- 1042 50 Nakada, S., Ogasawara, R., Kawada, S., Maekawa, T. & Ishii, N. Correlation between  
1043 Ribosome Biogenesis and the Magnitude of Hypertrophy in Overloaded Skeletal  
1044 Muscle. *PLoS One* **11**, doi:10.1371/journal.pone.0147284. (2016).
- 1045 51 Goodman, C. A. *et al.* Novel insights into the regulation of skeletal muscle protein  
1046 synthesis as revealed by a new nonradioactive in vivo technique. *FASEB J* **25**, 1028-  
1047 1039, doi:fj.10-168799 [pii] (2011).
- 1048 52 Atherton, P. J. & Smith, K. Muscle protein synthesis in response to nutrition and  
1049 exercise. *J Physiol* **590**, 1049-1057, doi:10.1113/jphysiol.2011.225003 (2012).
- 1050 53 Bodine, S. C. *et al.* Identification of ubiquitin ligases required for skeletal muscle  
1051 atrophy. *Science* **294**, 1704-1708, doi:10.1126/science.1065874 (2001).
- 1052 54 Krawiec, B. J., Frost, R. A., Vary, T. C., Jefferson, L. S. & Lang, C. H. Hindlimb  
1053 casting decreases muscle mass in part by proteasome-dependent proteolysis but  
1054 independent of protein synthesis. *Am J Physiol Endocrinol Metab* **289**, E969-980,  
1055 doi:10.1152/ajpendo.00126.2005 (2005).
- 1056 55 Vainshtein, A. & Hood, D. A. The regulation of autophagy during exercise in skeletal  
1057 muscle. *J Appl Physiol (1985)*, jap 00550 02015,  
1058 doi:10.1152/jappphysiol.00550.2015 (2015).
- 1059 56 Bergstrom, J. Muscle electrolytes in man. *Scand J Clin Lab Invest* **68**, 1-110 (1962).
- 1060 57 Evans, W. J., Phinney, S. D. & Young, V. R. Suction applied to a muscle biopsy  
1061 maximizes sample size. *Med Sci Sports Exerc* **14**, 101-102 (1982).
- 1062 58 Livak, K. J. & Schmittgen, T. D. Analysis of relative gene expression data using real-  
1063 time quantitative PCR and the 2(-Delta Delta C(T)) Method. *Methods* **25**, 402-408,  
1064 doi:10.1006/meth.2001.1262 (2001).
- 1065 59 Vandesompele, J. *et al.* Accurate normalization of real-time quantitative RT-PCR data  
1066 by geometric averaging of multiple internal control genes. *Genome Biol* **3**,  
1067 RESEARCH0034 (2002).
- 1068 60 Mane, V. P., Heuer, M. A., Hillyer, P., Navarro, M. B. & Rabin, R. L. Systematic  
1069 method for determining an ideal housekeeping gene for real-time PCR analysis. *J*  
1070 *Biomol Tech* **19**, 342-347 (2008).
- 1071 61 Hopkins, W. G., Marshall, S. W., Batterham, A. M. & Hanin, J. Progressive statistics  
1072 for studies in sports medicine and exercise science. *Med Sci Sports Exerc* **41**, 3-13,  
1073 doi:10.1249/MSS.0b013e31818cb278 (2009).
- 1074 62 Batterham, A. M. & Hopkins, W. G. Making Meaningful Inferences About  
1075 Magnitudes. *Sportscience* (2005). <[sportsci.org/jour/05/ambwgh.htm](http://sportsci.org/jour/05/ambwgh.htm)>.
- 1076 63 Thomson, D. M., Fick, C. A. & Gordon, S. E. AMPK activation attenuates S6K1, 4E-  
1077 BP1, and eEF2 signaling responses to high-frequency electrically stimulated skeletal  
1078 muscle contractions. *J Appl Physiol* **104**, 625-632, doi:00915.2007 [pii] (2008).

1079

1080

1081        **7. Acknowledgements**

1082        We gratefully acknowledge the efforts of the participants, without whom this study would not  
1083        have been possible. We also acknowledge Dr Chris Shaw (Deakin University) for technical  
1084        assistance with the immunofluorescence analysis. This study was supported, in part, by a grant  
1085        from the Gatorade Sports Science Institute (GSSI) awarded to J.J.F.

1086

1087

1088 **8. Author contributions statement**

1089 Study design was performed by J.J.F., J.D.B., E.D.H., D.J.B. and N.K.S. Data collection was  
1090 performed by J.J.F, M.J.A and A.P.G. Analysis and interpretation of data was performed by  
1091 J.J.F., J.D.B., E.D.H., D.J.B. and N.K.S. The manuscript was written by J.J.F., D.J.B., and  
1092 N.K.S., while J.D.B., E.D.H., M.J.A and A.P.G. critically revised the manuscript. All authors  
1093 approved the final version of the manuscript.

1094

1095 All data collection and data analysis for this study was conducted and performed in the exercise  
1096 physiology and biochemistry laboratories at Victoria University, Footscray Park campus,  
1097 Melbourne Australia.

1098

1099

1100        **9. Additional information**

1101        *Competing financial interests*

1102        The authors declare no conflicts of interest relevant to the contents of this manuscript.

1103

1104

1105

1106

1107

1108

## 10. Tables

**Table 1.** Details of PCR primers used for mRNA analysis

| Gene           | Forward sequence                | Reverse sequence              | NCBI reference sequence |
|----------------|---------------------------------|-------------------------------|-------------------------|
| MuRF-1         | 5'-CCTGAGAGCCATTGACTTTGG-3'     | 5'-CTTCCCTTCTGTGGACTCTTCCT-3' | NM_032588.3             |
| Atrogin-1      | 5'-GCAGCTGAACAACATTCAGATCAC-3'  | 5'-CAGCCTCTGCATGATGTTTCAGT-3' | NM_058229.3             |
| Fox-O1         | 5'-TTGTTACATAGTCAGCTTG-3'       | 5'-TCACTTTCCTGCCCAACCAG-3'    | NM_002015.3             |
| PGC-1 $\alpha$ | 5'-GGCAGAAGGCAATTGAAGAG-3'      | 5'-TCAAAACGGTCCCTCAGTTC-3'    | NM_013261.3             |
| UBF            | 5'-CCTGGGGAAGCAGTGGTCTC-3       | 5'-CCCTCCTCACTGATGTTTCAGC-3   | XM_006722059.2          |
| TIF-1A         | 5'-GTTTCGGTTTGGTGGAACTGTG-3     | 5'-TCTGGTCATCCTTTATGTCTGG-3   | XM_005255377.3          |
| Cyclin D1      | 5'-GCTGCGAAGTGGAACCATC-3        | 5'-CCTCCTTCTGCACACATTTGAA-3   | NM_053056.2             |
| POLR1B         | 5'-GCTACTGGGAATCTGCGTTCT-3      | 5'-CAGCGGAAATGGGAGAGGTA-3     | NM_019014.5             |
| TBP            | 5'-CAGTGACCCAGCAGCATCACT-3'     | 5'-AGGCCAAGCCCTGAGCGTAA-3'    | M55654.1                |
| Cyclophilin    | 5'-GTCAACCCACCGTGTTCCTTC-3'     | 5'-TTTCTGCTGTCTTTGGGACCTTG-3' | XM_011508410.1          |
| GAPDH          | 5'-AAAGCCTGCCGGTGACTAAC-3'      | 5'-CGCCAATACGACCAAATCAGA-3'   | NM_001256799.2          |
| $\beta$ 2M     | 5'-TGCTGTCTCCATGTTTGATGTATCT-3' | 5'-TCTCTGCTCCCCACCTCTAAGT-3'  | NM_004048.2             |

MuRF-1, muscle RING-finger 1; Fox-O1, forkhead box-O1; PGC-1 $\alpha$ , peroxisome proliferator activated receptor gamma co-activator 1 alpha; GAPDH, glyceraldehyde 3-phosphate dehydrogenase; UBF, upstream binding factor; TIF-1A, RRN3 polymerase 1 transcription factor; POLR1B, polymerase (RNA) 1 polypeptide B; TBP, TATA binding protein;  $\beta$ 2M, beta-2 microglobulin.

**Table 2.** Details of PCR primers used for rRNA analysis

| Target             | Catalogue number |
|--------------------|------------------|
| 45S pre-rRNA       | PPH82089A        |
| 5.8S rRNA (mature) | PPH82091A        |
| 18S rRNA (mature)  | PPH71602A        |
| 28S rRNA (mature)  | PPH82090A        |
| 5.8S-ITS (span)    | PPH82111A        |
| 18S-ETS (span)     | PPH82110A        |
| 28S-ITS (span)     | PPH82112A        |

**Table 3.** Physiological and psychological (RPE) responses to a single bout of high-intensity interval training (HIT) or work-matched moderate-intensity continuous training (MICT) performed during the final training session.

|                                       | Time (min) |              |              |              |              |              |              |              |              |              |
|---------------------------------------|------------|--------------|--------------|--------------|--------------|--------------|--------------|--------------|--------------|--------------|
|                                       | Rest       | 10           | 16           | 22           | 28           | 34           | +2           | +5           | +10          | +15          |
| Lactate (mmol·L <sup>-1</sup> )       |            |              |              |              |              |              |              |              |              |              |
| HIT                                   | 0.7 ± 0.3  | 2.6 ± 0.6 *# | 5.4 ± 1.4 *# | 6.8 ± 1.2 *# | 7.3 ± 1.4 *# | 7.3 ± 1.3 *# | 7.3 ± 1.8 *# | 7.2 ± 1.6 *# | 6.0 ± 1.5 *# | 4.9 ± 1.4 *# |
| MICT                                  | 0.7 ± 0.3  | 1.7 ± 0.5 *  | 2.6 ± 0.8 *  | 2.7 ± 0.8 *  | 2.8 ± 0.9 *  | 2.8 ± 1.0 *  | 2.4 ± 0.8 *  | 2.2 ± 0.8 *  | 1.8 ± 0.7 *  | 1.4 ± 0.5 *  |
| Glucose (mmol·L <sup>-1</sup> )       |            |              |              |              |              |              |              |              |              |              |
| HIT                                   | 4.7 ± 0.8  | 4.6 ± 0.9    | 4.8 ± 0.9    | 5.0 ± 0.9 #  | 5.4 ± 1.1 #  | 5.9 ± 1.2 *# | 6.3 ± 1.5 *# | 6.2 ± 1.3 *# | 5.9 ± 1.2 *# | 5.4 ± 1.0 #  |
| MICT                                  | 4.5 ± 0.5  | 4.5 ± 0.4    | 4.4 ± 0.6    | 4.2 ± 0.3    | 4.3 ± 0.4    | 4.3 ± 0.4    | 4.5 ± 0.5    | 4.7 ± 0.4    | 4.6 ± 0.4    | 4.5 ± 0.4    |
| Heart rate (beats·min <sup>-1</sup> ) |            |              |              |              |              |              |              |              |              |              |
| HIT                                   | 63 ± 11    | 154 ± 9 *#   | 162 ± 9 *#   | 166 ± 9 *#   | 170 ± 10 *#  | 173 ± 9 *#   | -            | -            | -            | -            |
| MICT                                  | 66 ± 5     | 140 ± 6 *    | 147 ± 17 *   | 150 ± 16 *   | 152 ± 17 *   | 154 ± 17 *   | -            | -            | -            | -            |
| RPE (AU)                              |            |              |              |              |              |              |              |              |              |              |
| HIT                                   | 6 ± 0      | 13 ± 3 *     | 15 ± 3 *#    | 17 ± 2 *#    | 18 ± 2 *#    | 18 ± 2 *#    | -            | -            | -            | -            |
| MICT                                  | 6 ± 0      | 11 ± 2 *     | 12 ± 2 *     | 13 ± 2 *     | 14 ± 2 *     | 14 ± 2 *     | -            | -            | -            | -            |

Values are means ± SD. HIT, high-intensity interval training cycling; MICT, continuous cycling; RPE, rating of perceived exertion. \*,  $P < 0.05$  vs. rest; #,  $P < 0.05$  vs. MICT at same time point.



**Table 4.** Venous blood lactate and glucose responses to a single bout of resistance exercise (RE) either performed alone (RT) or when performed after either high-intensity interval training (HIT+RT) or work-matched moderate-intensity continuous training (MICT+RT) during the final training session.

|                                 | Time (min)   |             |             |             |              |               |              |           |
|---------------------------------|--------------|-------------|-------------|-------------|--------------|---------------|--------------|-----------|
|                                 | End          | +2          | +5          | +10         | +30          | +60           | +90          | +180      |
| Lactate (mmol·L <sup>-1</sup> ) |              |             |             |             |              |               |              |           |
| RT                              | 2.1 ± 0.7 *  | 2.3 ± 0.9 * | 2.2 ± 1.0 * | 1.7 ± 0.8 * | 1.3 ± 1.3    | 0.7 ± 0.3     | 0.6 ± 0.2    | 0.5 ± 0.2 |
| HIT+RT                          | 3.5 ± 1.3 *‡ | 3.6 ± 1.5 * | 3.3 ± 1.4 * | 2.6 ± 1.2 * | 1.6 ± 0.4 *# | 1.2 ± 0.3 *#‡ | 0.8 ± 0.1 #‡ | 0.7 ± 0.1 |
| MICT+RT                         | 2.4 ± 1.2 *  | 2.5 ± 1.4 * | 2.2 ± 1.2 * | 1.7 ± 0.7 * | 0.9 ± 1.3    | 0.7 ± 0.2     | 0.6 ± 0.1    | 0.5 ± 0.2 |
| Glucose (mmol·L <sup>-1</sup> ) |              |             |             |             |              |               |              |           |
| RT                              | 4.7 ± 0.3    | 4.7 ± 0.4   | 4.7 ± 0.4   | 4.7 ± 0.4   | 4.7 ± 0.3 ^  | 4.3 ± 0.5     | 4.5 ± 0.3    | 4.5 ± 0.2 |
| HIT+RT                          | 4.5 ± 0.9    | 4.5 ± 0.4   | 4.5 ± 0.4   | 4.4 ± 0.4   | 4.5 ± 0.2    | 4.7 ± 0.3 #   | 4.5 ± 0.2    | 4.6 ± 0.3 |
| MICT+RT                         | 4.6 ± 0.3    | 4.6 ± 0.3   | 4.7 ± 0.2   | 4.6 ± 0.2   | 4.7 ± 0.2 ^  | 4.4 ± 0.1     | 4.4 ± 0.2    | 4.4 ± 0.4 |

Values are means ± SD. HIT+RT, high-intensity interval training cycling and resistance training; MICT+RT, continuous cycling and resistance training; RT, resistance training; \*,  $P < 0.05$  vs. rest; #,  $P < 0.05$  vs. MICT at same time point; ^,  $P < 0.05$  vs. HIT at same time point.; ‡,  $P < 0.05$  vs. RT at same time point.

**Table 5.** Total RNA content and type I and type II muscle fibre cross-sectional area (CSA) of the vastus lateralis before (PRE-T) and after (POST-T) eight weeks of either RT alone, or RT combined with either high-intensity interval training (HIT+RT) or moderate-intensity continuous training (MICT+RT).

| Measure                                     | PRE-T                  | POST-T                    |
|---------------------------------------------|------------------------|---------------------------|
| Total skeletal muscle RNA (ng/mg tissue)    |                        |                           |
| RT                                          | 914 ± 202 <sup>^</sup> | 810 ± 134 <sup>*</sup>    |
| HIT+RT                                      | 581 ± 176              | 740 ± 129                 |
| MICT+RT                                     | 680 ± 81               | 818 ± 133                 |
| Type I muscle fibre CSA (µm <sup>2</sup> )  |                        |                           |
| RT                                          | 4539 ± 848             | 5533 ± 1913 <sup>*b</sup> |
| HIT+RT                                      | 6713 ± 1849            | 5183 ± 1413               |
| MICT+RT                                     | 5509 ± 2326            | 5228 ± 1277               |
| Type II muscle fibre CSA (µm <sup>2</sup> ) |                        |                           |
| RT                                          | 5296 ± 1347            | 6456 ± 2235               |
| HIT+RT                                      | 6470 ± 1481            | 6621 ± 2018               |
| MICT+RT                                     | 5051 ± 1531            | 5728 ± 688                |

Data presented are means ± SD. \* =  $P < 0.05$  vs. PRE-T, ^ =  $P < 0.05$  vs. both HIT+RT and MICT+RT at PRE-T, b = change between PRE-T and POST-T substantially greater vs. HIT+RT.

## 11. Figure and figure legends

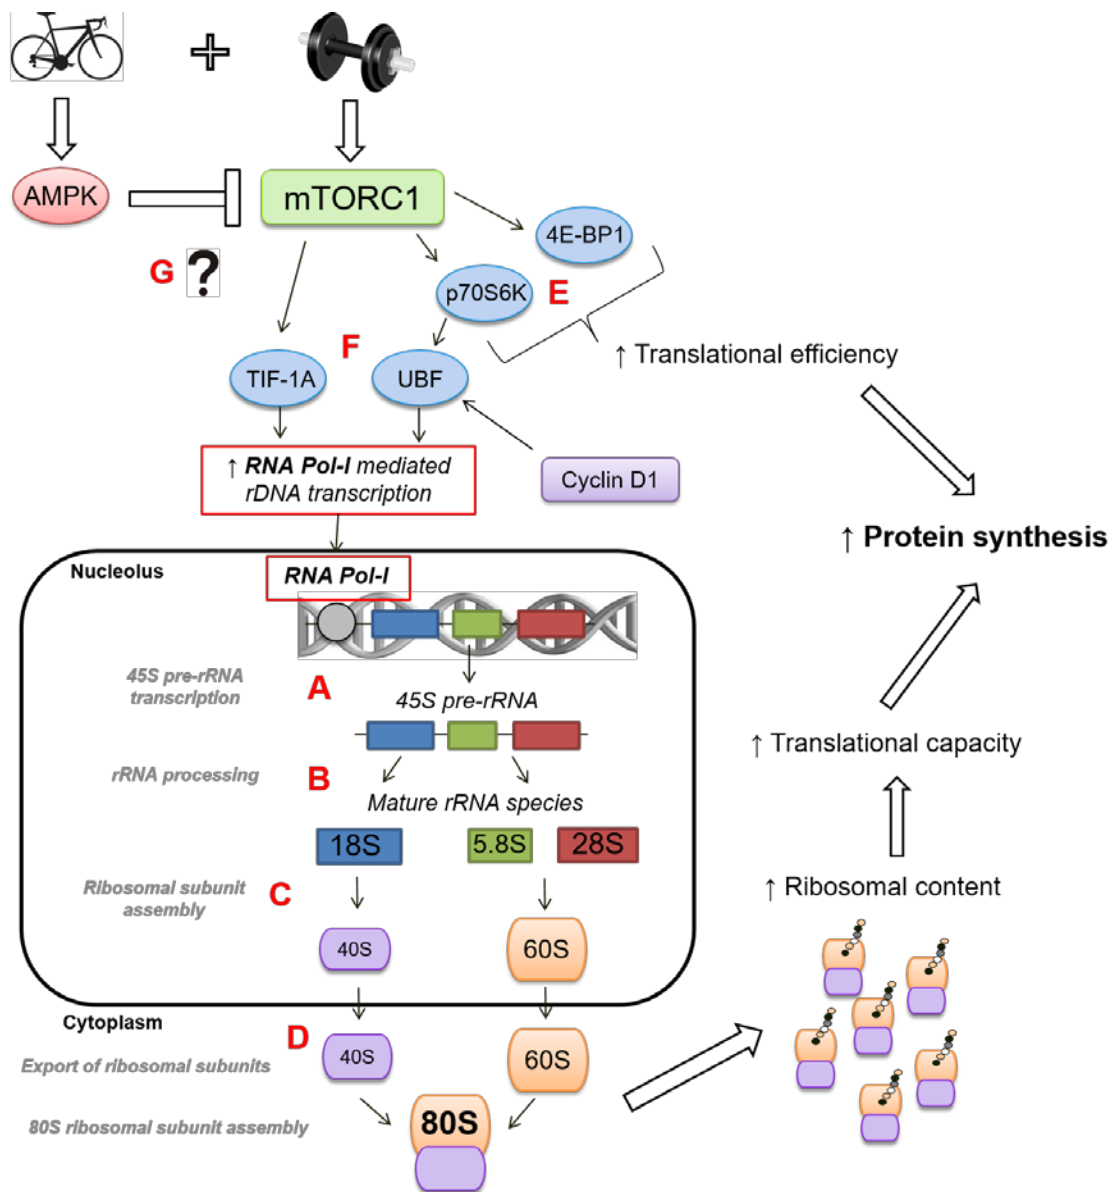

**Figure 1. Overview of the role of mTORC1 signalling in promoting ribosome biogenesis following a single session of resistance exercise, and the potential effect of incorporating endurance training (i.e., performing concurrent training). Adapted from <sup>24</sup>.** Ribosome biogenesis involves transcription of the 45S rRNA (ribosomal RNA) precursor (45S pre-rRNA) (A) mediated by RNA Polymerase I (Pol-I), processing of the 45S pre-rRNA into several smaller rRNAs (18S, 5.8S and 28S rRNAs) (B), assembly of these rRNAs and other ribosomal proteins into ribosomal subunits (40S and 60S) (C), and nuclear export of these ribosomal subunits into the cytoplasm <sup>24,26</sup> (D).

As well as regulating translational efficiency via downstream control of p70S6K (p70 kDa ribosomal protein subunit kinase 1) and 4E-BP1 (eukaryotic initiation factor 4E binding protein

1) **(E)**, mTORC1 is a key mediator of ribosome biogenesis by regulating transcription factors for genes encoding RNA Pol-I (and also RNA Pol-II and -III, which are not shown in figure)<sup>25</sup>. Transcription of the 45S pre-rRNA by RNA Pol-I requires a transcriptional complex including TIF-1A (transcription initiation factor 1A; also known as RRN5) and UBF (upstream binding factor), both of which are regulated by the mTORC1 pathway<sup>28,29</sup> **(F)**.

Activation of AMPK is known to inhibit mTORC1 signalling in rodent skeletal muscle<sup>63</sup>, and AMPK activation in skeletal muscle is traditionally associated with endurance-type exercise. However, whether signalling events initiated by endurance training, when performed concurrently with resistance training, have the potential to interfere with mTORC1-mediated regulation of ribosome biogenesis is currently unclear **(G)**.

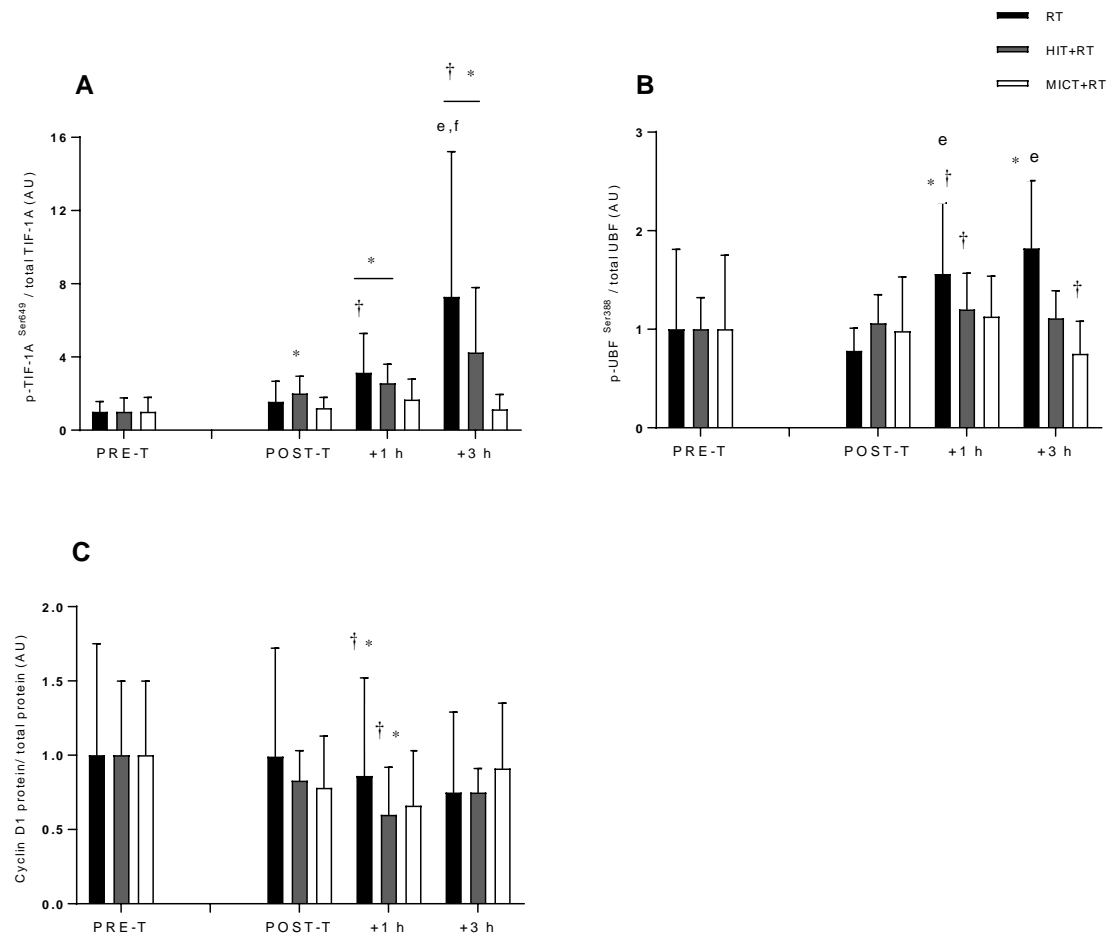

**Figure 2.** Phosphorylation of TIF-1A<sup>Ser649</sup> (A), UBF<sup>Ser388</sup> (B), and total protein content of cyclin D1 (C) before (PRE-T) and after (POST-T) eight weeks of either RT alone, or RT combined with either high-intensity interval training (HIT+RT) or moderate-intensity continuous training (MICT+RT), and 1 h and 3 h after a single exercise bout performed post-training. Data presented are means  $\pm$  SD and expressed relative to the PRE-T value for each corresponding group. \* =  $P < 0.05$  vs. PRE-T, † =  $P < 0.05$  vs. POST-T. Change from POST-T substantially greater vs. e = HIT+RT, f = MICT+RT.

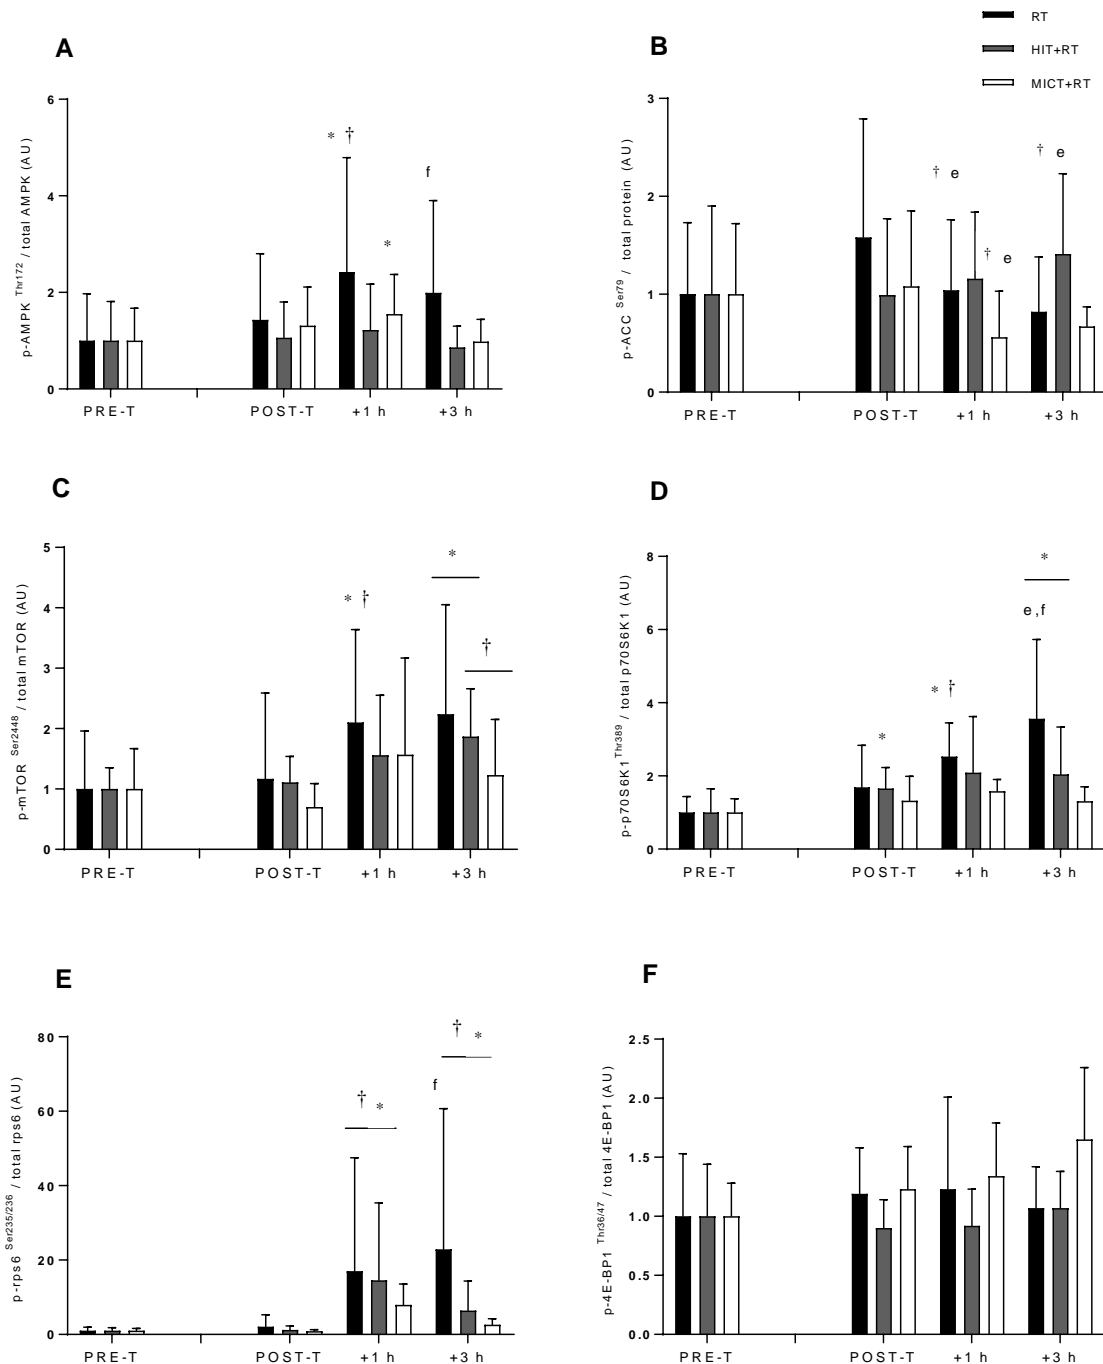

**Figure 3.** Phosphorylation of AMPK<sup>Thr172</sup> (A), ACC<sup>Ser79</sup> (B), mTOR<sup>Ser2448</sup> (C), p70S6K<sup>Thr389</sup> (D), rps6<sup>Ser235/236</sup> (E) and 4E-BP1<sup>Thr36/47</sup> (F) before (PRE-T) and after (POST-T) eight weeks of either RT alone, or RT combined with either high-intensity interval training (HIT+RT) or moderate-intensity continuous training (MICT+RT), and 1 h and 3 h after a single exercise bout performed post-training. Data presented are means  $\pm$  SD and expressed relative to the PRE value for each corresponding group. \* =  $P < 0.05$  vs. PRE-T, † =  $P < 0.05$  vs. POST-T. Change from POST-T substantially greater vs. e = HIT+RT, f = MICT+RT.

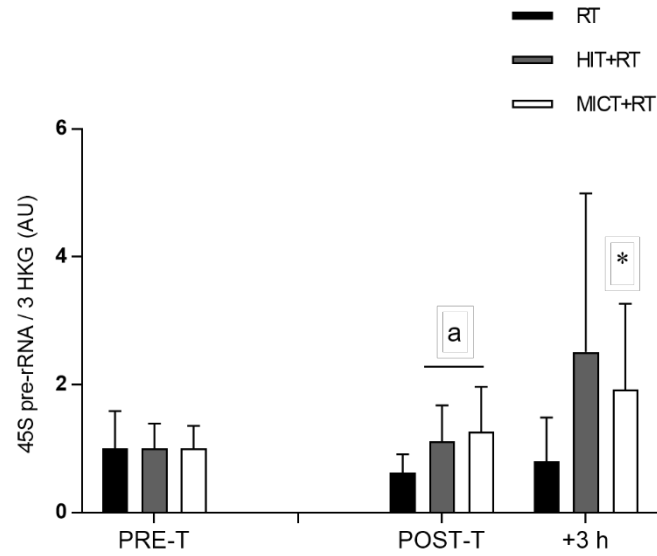

**Figure 4.** Expression of 45S pre-rRNA relative to the geometric mean of cyclophilin,  $\beta$ 2M and TBP expression before (PRE-T) and after (POST-T) eight weeks of either RT alone, or RT combined with either high-intensity interval training (HIT+RT) or moderate-intensity continuous training (MICT+RT), and 1 h and 3 h after a single exercise bout performed post-training. Data presented are means  $\pm$  SD and expressed relative to the PRE-T value for each corresponding group. \* =  $P < 0.05$  vs. PRE-T, a = change between PRE-T and POST-T substantially different vs. RT.

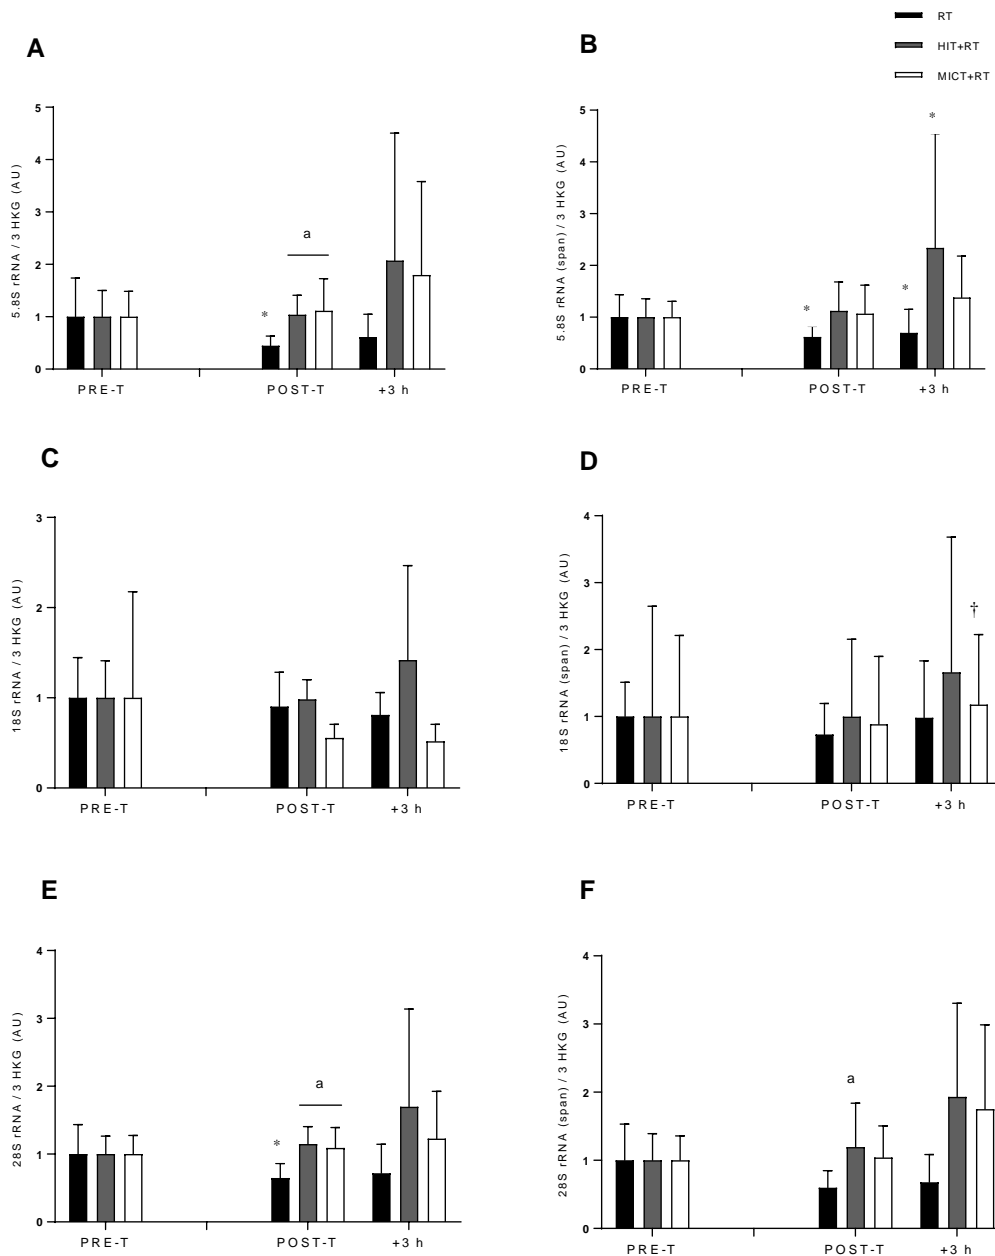

**Figure 5.** Expression of the mature rRNA transcripts 5.8S rRNA (A), 18S rRNA (C), and 28S rRNA (E), and rRNA transcripts bound to the 45S pre-RNA precursor: 5.8S rRNA (span) (B) 18S rRNA (span) (D) and 28S rRNA (span) (F) relative to the geometric mean of cyclophilin,  $\beta$ 2M and TBP expression before (PRE-T) and after (POST-T) eight weeks of either RT alone, or RT combined with either high-intensity interval training (HIT+RT) or moderate-intensity continuous training (MICT+RT), and 1 h and 3 h after a single exercise bout performed post-training. Data presented are means  $\pm$  SD and expressed relative to the PRE-T value for each corresponding group. \* =  $P < 0.05$  vs. PRE-T, † =  $P < 0.05$  vs. POST-T, a = change between PRE-T and POST-T substantially greater vs RT.



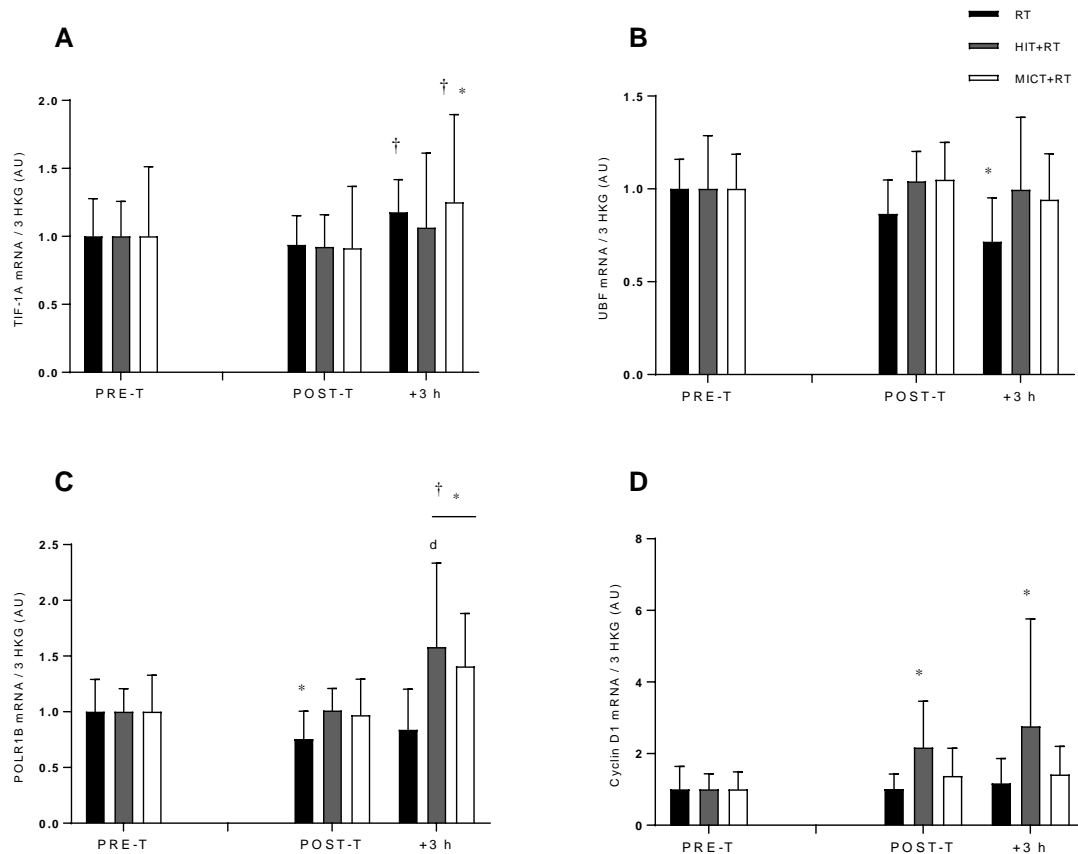

**Figure 6.** mRNA expression of TIF-1A (A), UBF (B), POLR1B (C), and cyclin D1 (D) relative to the geometric mean of cyclophilin,  $\beta$ 2M and TBP expression before (PRE-T) and after (POST-T) eight weeks of either RT alone, or RT combined with either high-intensity interval training (HIT+RT) or moderate-intensity continuous training (MICT+RT), and 1 h and 3 h after a single exercise bout performed post-training. Data presented are means  $\pm$  SD and expressed relative to the PRE value for each corresponding group. \* =  $P < 0.05$  vs. PRE, † =  $P < 0.05$  vs. POST. Change from POST substantially greater vs. d = RT.

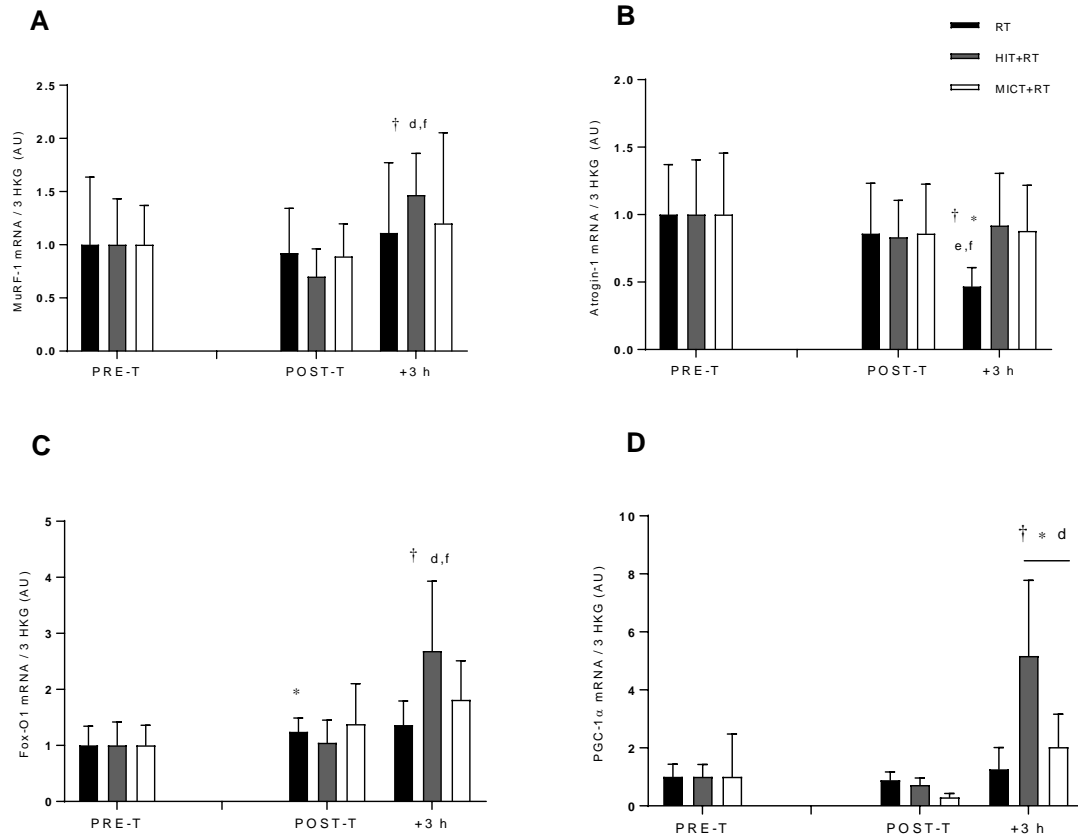

**Figure 7.** mRNA expression of MuRF-1 (A), Atrogin-1 (B), Fox-O1 (C) and PGC-1 $\alpha$  (D) relative to the geometric mean of cyclophilin,  $\beta$ 2M and TBP expression before (PRE) and after (POST) eight weeks of either RT alone, or RT combined with either high-intensity interval training (HIT+RT) or moderate-intensity continuous training (MICT+RT), and 1 h and 3 h after a single exercise bout performed post-training. Data presented are means  $\pm$  SD and expressed relative to the PRE value for each corresponding group. \* =  $P < 0.05$  vs. PRE, † =  $P < 0.05$  vs. POST. Change from POST substantially greater vs. d = RT, e = HIT+RT, f = MICT+RT.

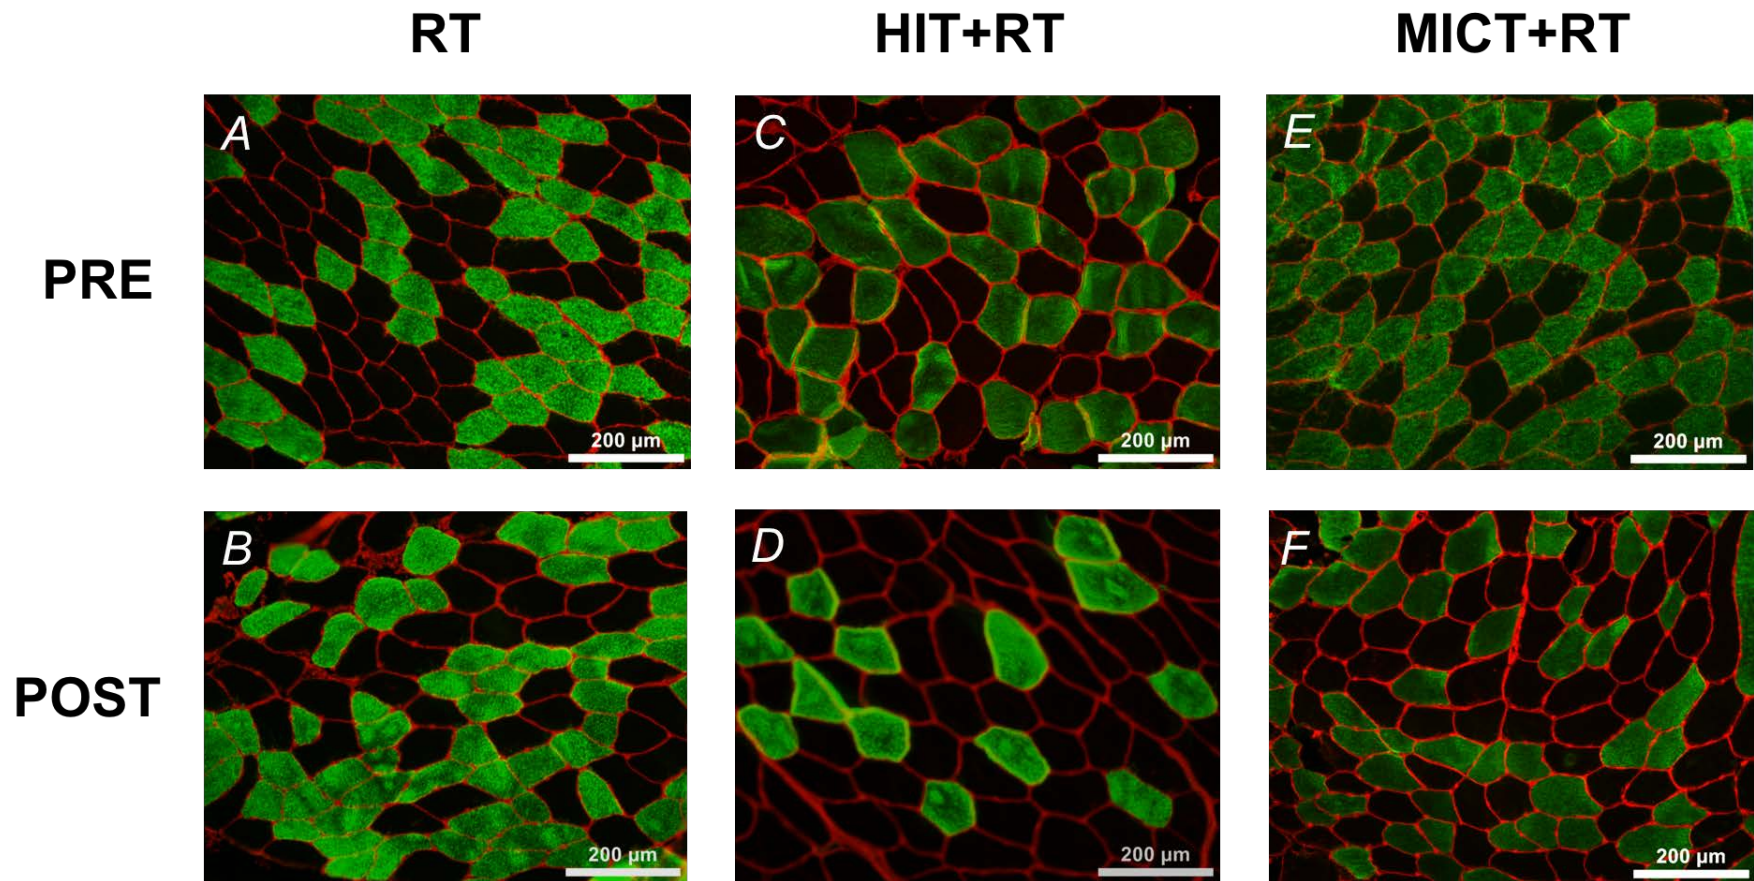

**Figure 8.** Representative immunohistochemical images of muscle cross-sections obtained before (PRE) and after (POST) eight weeks of either RT alone (images A and B, respectively), or RT combined with either high-intensity interval training (HIT+RT; images C and D, respectively) or moderate-intensity continuous training (MICT+RT; images E and F, respectively). Muscle fibre membranes are stained red, type I muscle fibres are stained green, and type II muscle fibres are unstained.

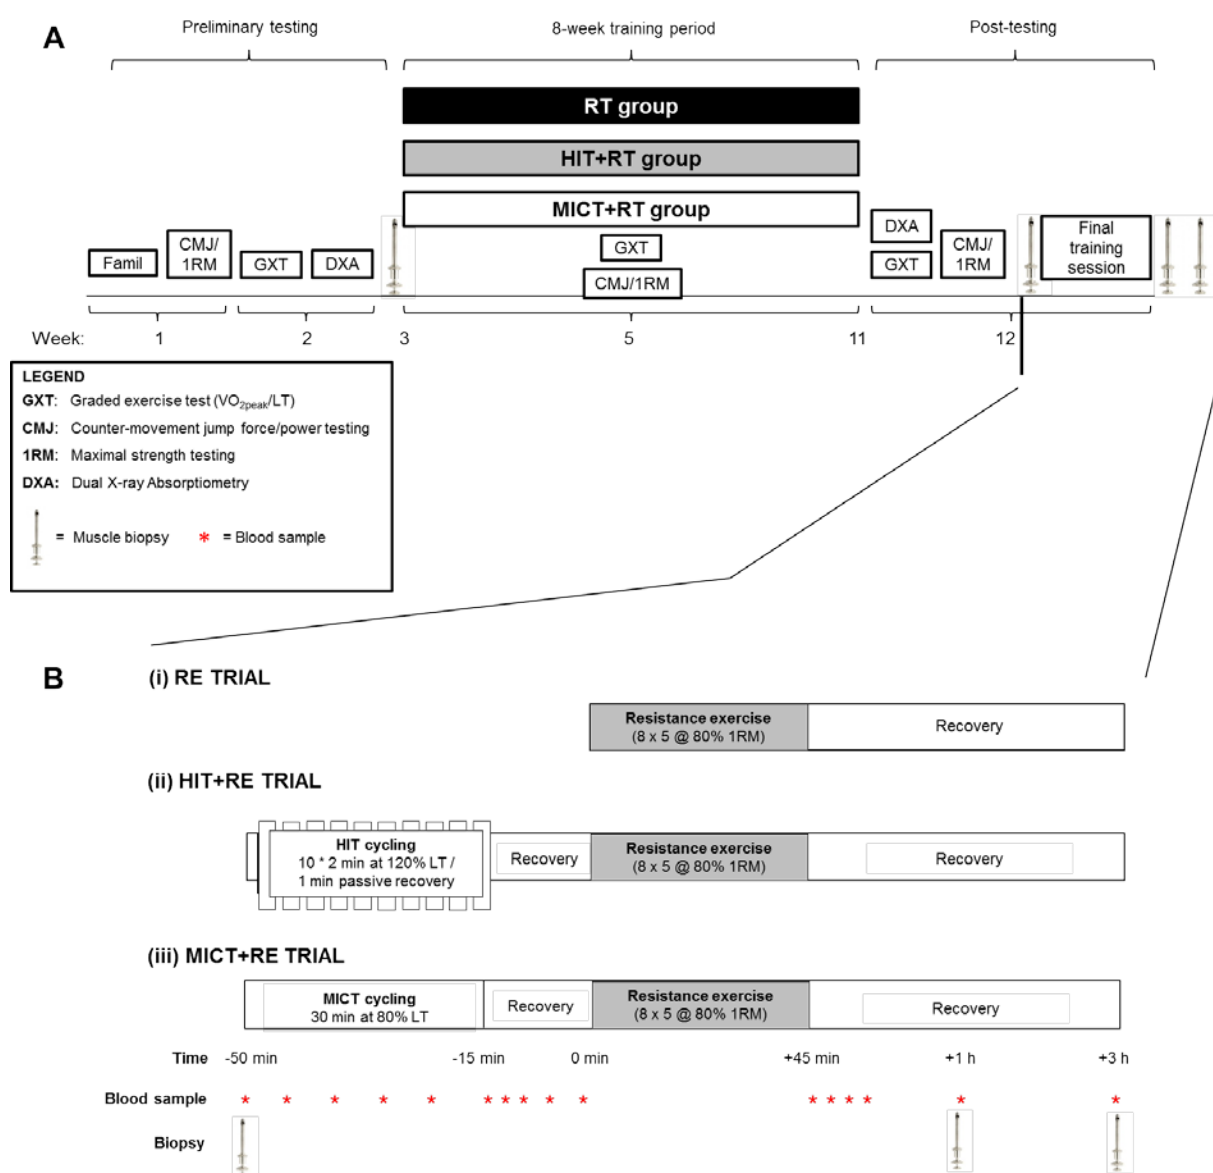

**Figure 9.** Study overview (A) and timelines for the final training session (B). Participants first completed 8 weeks of either resistance training (RT) alone, or RT combined with either high-intensity interval training (HIT+RT) or moderate-intensity continuous training (MICT+RT). For the final training session (B), participants completed the RE protocol alone (i) or after a 15-min recovery following the completion of either HIT (ii) or work-matched MICT (iii) cycling. Muscle biopsies were obtained from the vastus lateralis at rest before training, and immediately before beginning the final training session, and 1 h and 3 h after completion of RE.

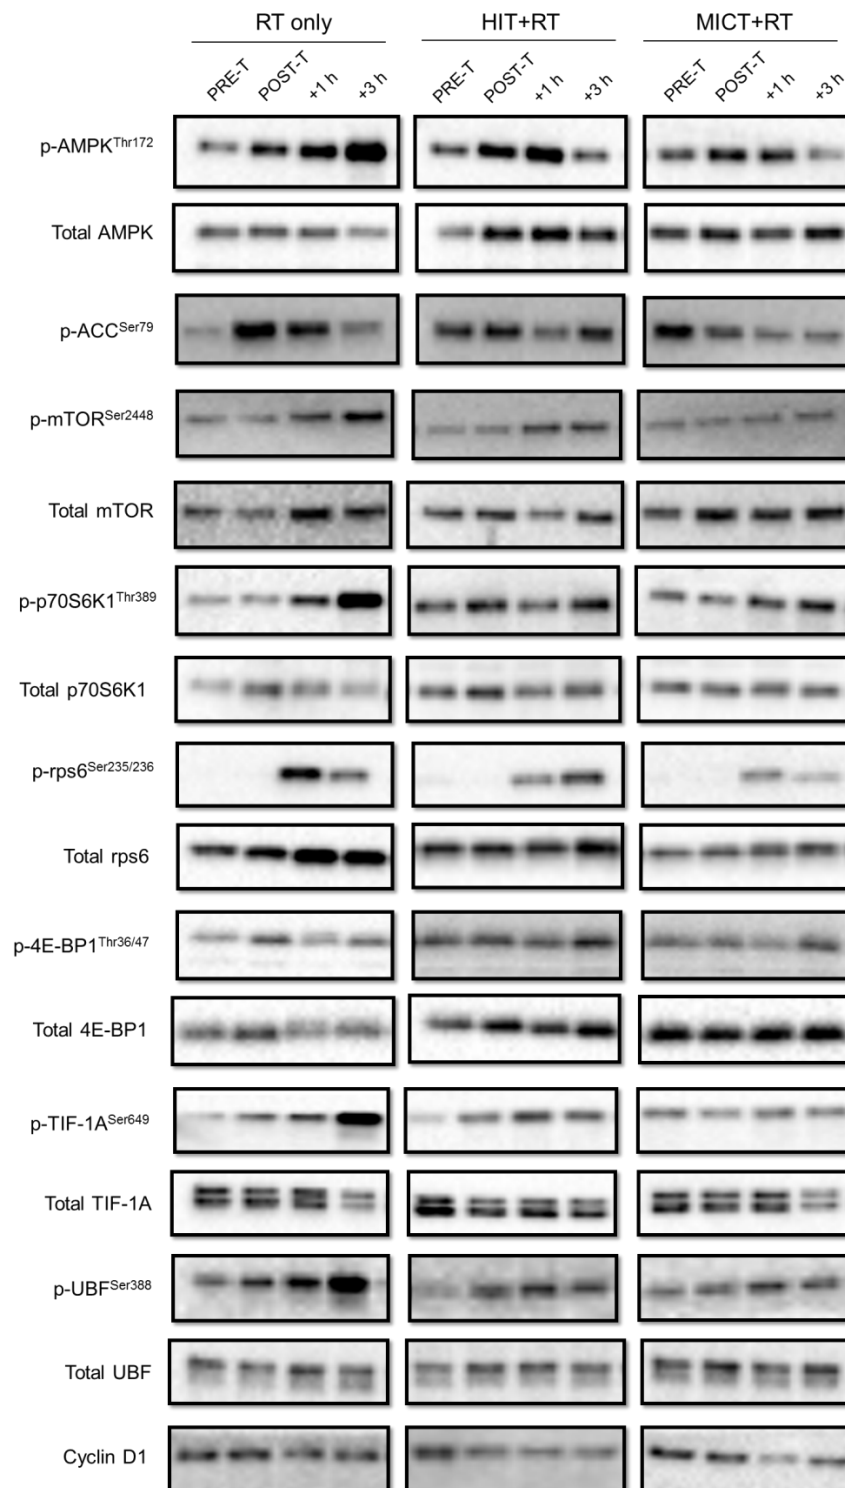

**Figure 10.** Representative western blots for the phosphorylation (p-) and total protein content of signalling proteins before (PRE-T) and after (POST-T) eight weeks of either RT alone, or RT combined with either high-intensity interval training (HIT+RT) or moderate-intensity continuous training (MICT+RT), and 1 h (+1 h) and 3 h (+3 h) after a single exercise bout performed post-training. Cropped western blot images are displayed for clarity of presentation, and full-length western blot images are presented in supplementary information.
